1 **Running Head: ANCHORED PHYLOGENOMICS OF ANGIOSPERMS**

2

3 **Anchored Phylogenomics of Angiosperms I:**

4 **Assessing the Robustness of Phylogenetic Estimates**

5

6 Chris Buddenhagen<sup>\*1,16</sup>, Alan R. Lemmon<sup>\*2,17</sup>, Emily Moriarty Lemmon<sup>1,18</sup>, Jeremy Bruhl<sup>3,19</sup>,  
7 Jennifer Cappa<sup>4,20</sup>, Wendy L. Clement<sup>5,21</sup>, Michael J. Donoghue<sup>6,22</sup>, Erika J. Edwards<sup>7,23</sup>, Andrew  
8 L. Hipp<sup>8,24</sup>, Michelle Kortyna<sup>1,25</sup>, Nora Mitchell<sup>9,26</sup>, Abigail Moore<sup>10,27</sup>, Christina J. Prychid<sup>3,11,28</sup>,  
9 Maria C. Segovia-Salcedo<sup>12,29</sup>, Mark P. Simmons<sup>13,30</sup>, Pamela S. Soltis<sup>14,31</sup>, Stefan Wanke<sup>15,32</sup>,  
10 and Austin Mast<sup>1,33</sup>

11 \*Co-first authors

12 <sup>1</sup> *Department of Biological Science, Florida State University, 319 Stadium Dr., P.O. Box*  
13 *3064295, Tallahassee, FL, 32306-4295;*

14 <sup>2</sup> *Department of Scientific Computing, Florida State University, Dirac Science Library,*  
15 *Tallahassee, FL, 32306-4102;*

16 <sup>3</sup> *School of Environmental & Rural Science, University of New England, Armidale, NSW,*  
17 *Australia, 2351;*

18 <sup>4</sup> *Department of Biology, Colorado State University, Fort Collins, CO 80523-1878;*

19 <sup>5</sup> *The College of New Jersey, 200 Pennington rd, Ewing, NJ 08628*

20 <sup>6</sup> *Department of Ecology and Evolutionary Biology, Yale University, PO Box 208105, New*  
21 *Haven, CT 06520*

22 <sup>7</sup> *Ecology and Evolutionary Biology, Brown University, Providence, RI 02912*

23 <sup>8</sup> *The Morton Arboretum, 4100 Illinois Rte 53, Lisle, IL 60532*

24 <sup>9</sup> *Department of Ecology and Evolutionary Biology, University of Connecticut, 75 North*  
25 *Eagleville Rd, U-3043, Storrs, CT 06269-3043*

26 <sup>10</sup> *Oklahoma Biological Survey and Department of Microbial and Plant Biology, University of*  
27 *Oklahoma, 770 Van Vleet Oval, Norman, OK 73019-6131*

28 <sup>11</sup> *Comparative Plant and Fungal Biology, Royal Botanic Gardens Kew, Richmond, Surrey,*  
29 *United Kingdom, TW9 3DS*

30 <sup>12</sup> *Departamento de Ciencias de la vida y Agricultura, Universidad de las Fuerzas Armadas*  
31 *ESPE. Av. General Rumiñahui s/n. Sangolquí, Ecuador. PO-BOX 171-5-231B*

32 <sup>13</sup> *Department of Biology, Colorado State University, Fort Collins, CO 80523-1878*

33 <sup>14</sup> *Florida Museum of Natural History, University of Florida, Dickinson Hall, Gainesville, FL*  
34 *32611*

35 <sup>15</sup> *Institut für Botanik, Technische Universität Dresden, D-01062 Dresden, Germany*

36  
37                                   <sup>16</sup>cbuddenhagen@gmail.com, <sup>17</sup>alemmon@fsu.edu,  
38                   <sup>18</sup>chorusfrog@bio.fsu.edu, <sup>19</sup>jbruhl@une.edu.au, <sup>20</sup>jjlarsen@rams.colostate.edu, <sup>21</sup>  
39                                   clementw@tcnj.edu  
40           <sup>22</sup>michael.donoghue@yale.edu, <sup>23</sup>erika\_edwards@brown.edu, <sup>24</sup>ahipp@mortonarb.org, <sup>25</sup>  
41                   mk09g@my.fsu.edu, <sup>26</sup>nora.mitchell@uconn.edu, <sup>27</sup>abigail.j.morre@ou.edu, <sup>28</sup>  
42                   C.Prychid@kew.org, <sup>29</sup>mcsegovia@espe.edu.ec, <sup>30</sup>Mark.Simmons@colostate.edu, <sup>31</sup>  
43                                   psoltis@flmnh.ufl.edu, <sup>32</sup>stefan.wanke@tu-dresden.de  
44                                                                                   <sup>33</sup>amast@bio.fsu.edu  
45

46 **Corresponding Author:**

47 Alan R. Lemmon  
48 Department of Scientific Computing  
49 Florida State University  
50 Dirac Science Library  
51 Tallahassee, FL, 32306-4102  
52 Email: alemmon@fsu.edu  
53 Phone: (850)-445-8946  
54

55 **ABSTRACT**

56           We leverage genomic resources from 43 angiosperm species to develop enrichment  
57 probes useful for collecting ~500 loci from non-model taxa across the diversity of angiosperms.  
58 By taking an anchored phylogenomics approach, in which probes are designed to represent  
59 sequence diversity across the group, we are able to efficiently target loci with sufficient  
60 phylogenetic signal to resolve deep, intermediate, and shallow angiosperm relationships. After  
61 demonstrating the utility of this resource, we present a method that generates a heat map for each  
62 node on a phylogeny that reveals the sensitivity of support for the node across analysis  
63 conditions, as well as different locus, site and taxon schemes. Focusing on the effect of locus and  
64 site sampling, we use this approach to statistically evaluate relative support for the alternative  
65 relationships among eudicots, monocots, and magnoliids. Although the results from supermatrix  
66 and coalescent analyses are largely consistent across the tree, we find support for this deep  
67 relationship to be more sensitive to the particular choice of sites and loci when a supermatrix  
68 approach as employed. Averaged across analysis approaches and data subsampling schemes, our  
69 data support a eudicot-monocot sister relationship, which is supported by a number of recent  
70 angiosperm studies.

71

72

73 **KEYWORDS:** hybrid enrichment, probe set, phylogenetic informativeness, nuclear loci

74

75

76 A longstanding aim of angiosperm systematists has been to develop a unified approach to  
77 data collection across the entire clade. Previous efforts have demonstrated the importance of  
78 community coordination (e.g., *rbcL* sequencing; Chase et al. 1993). As the systematics  
79 community moves into the genomics era, however, new technologies are enabling researchers to  
80 transition from targeting a small number of primarily organellar loci, to targeting hundreds or  
81 thousands of loci that are both broadly distributed across the genome and broadly homologous  
82 across deep clades (Mamanova et al. 2010; Griffin et al. 2011; Crawford et al. 2012; Cronn et al.  
83 2012; Lemmon and Lemmon 2013; Davis et al. 2014; Wickett et al. 2014; Prum et al. 2015;  
84 Wicke and Schneeweiss 2015). Although progress has been made in plants recently using other  
85 approaches such as whole genome sequencing, whole-plastid sequencing (Ruhfel et al. 2014),  
86 and transcriptome sequencing (Burleigh et al. 2011; Lee et al. 2011; Wickett et al. 2014; Zeng et  
87 al. 2014), perhaps the most promising methodology to date is hybrid enrichment, which is  
88 rapidly resolving many previously intractable branches across the Tree of Life (Stull et al. 2013;  
89 Pyron et al. 2014; Brandley et al. 2015; Crawford et al. 2015; Eytan et al. 2015; Prum et al. 2015;  
90 Bryson et al. 2016; Meiklejohn et al. 2016; Tucker et al. 2016; Young et al. 2016). This method  
91 has the advantages of cost-effectiveness, high-throughput data production, and success with  
92 historical specimens, such as herbarium samples (Bi et al. 2013; Stull et al. 2013; Bakker 2015;  
93 Beck and Semple 2015). Hybrid enrichment is a method wherein short oligonucleotides (termed  
94 “probes” or “baits”) are designed to complement target loci across the genomes of a clade (e.g.,  
95 vertebrates, angiosperms, etc.). The researcher can choose the number, length, and type of loci to  
96 be targeted. In the laboratory, probes hybridize to genomic DNA libraries, facilitating  
97 enrichment of target loci relative to the remainder of the genome. The enriched DNA libraries  
98 are then sequenced on a high-throughput sequencing platform. Because of the flexible and

99 customizable nature of the method, hybrid enrichment has the potential to unify data collection  
100 for many different types of research questions across angiosperms.

101       Some versions of hybrid enrichment are generally less appropriate than others for  
102 phylogenetic studies in plants. For example, the “UCE” method, as originally defined (Faircloth  
103 et al. 2012), utilizes thousands of relatively-short ultraconserved elements scattered across the  
104 genome as target regions. The use of UCEs in plants may be limited because appear to be scarce  
105 in plants compared to other systems (6 non-repetitive, invariant UCEs in plants vs. 1120 in  
106 animals; Reneker et al. 2012). An alternative method, Anchored Hybrid Enrichment (AHE;  
107 Lemmon et al. 2012; Lemmon and Lemmon 2013), ensures high enrichment efficiency by  
108 leveraging genomic and transcriptomic resources to develop probe sets that reflect the natural  
109 sequence variation occurring across a clade. By incorporating probes reflecting this phylogenetic  
110 diversity, regions with moderate levels of sequence variation can be efficiently enriched.  
111 Following recommendations from simulation studies (Leaché and Rannala 2011), this method  
112 incorporates a moderate number (~500-1000) of moderately-conserved target loci. Thus, the  
113 phylogenetic information content of the data sets generated is high, and the reasonable  
114 sequencing effort required makes it affordable for researchers to collect data from hundreds to  
115 thousands of species across evolutionary timescales. This method has been applied to diverse  
116 taxa across the Tree of Life, leading to complete or nearly complete resolution of many clades of  
117 different taxonomic depth, including birds (Prum et al. 2015; Morales et al. 2016), snakes (Pyron  
118 et al. 2014; Ruane et al. 2015), flies (Young et al. 2016), lizards (Brandley et al. 2015; Tucker et  
119 al. 2016), teleost fish (Eytan et al. 2015), frogs (Peloso et al. 2016). Given the success of AHE in  
120 many other systems, and the success to date of hybrid enrichment efforts targeting individual  
121 angiosperm clades (Table 1; e.g., Asteraceae, Mandel et al. 2014), the time seems ripe to extend

122 AHE to angiosperm phylogenetics though development and implementation of a general  
123 angiosperm-wide enrichment resource.

124 Despite tremendous efforts to reconstruct the phylogeny of angiosperms, several deep  
125 nodes continue to be debated (Soltis et al. 2011; Burleigh et al. 2011; Wickett et al. 2014;  
126 Magallón et al. 2013). One reason for this difficulty is the large diversity in angiosperms—  
127 estimates suggest approximately 400,000 extant species (~300,000 described; Pimm and Joppa  
128 2015). A second reason is the limitation of many previous studies to a small number of plastid  
129 and nuclear ribosomal markers available at the time, which do not always contain sufficient  
130 information for resolving challenging nodes (e.g., Zimmer and Wen 2012), due to processes such  
131 as incomplete lineage sorting and hybridization. A third reason is that many previous studies  
132 have only presented results from a narrow set of data subsampling and methodological  
133 conditions (e.g., Wickett et al. 2014). An especially intractable node that may be influenced by  
134 these problems is the relationship among eudicots, monocots, and magnoliids at the base of the  
135 angiosperms. Previous work has suggested all possible alternative resolutions of these three  
136 clades depending upon type of data or taxa included and analysis method (eudicots-monocots  
137 sister: Soltis et al. 2011; eudicots-magnoliids sister: Burleigh et al. 2011, Lee et al. 2011;  
138 magnoliids-monocots sister: Wickett et al. 2014). Elucidating the true history of this group and  
139 other difficult clades will require a more comprehensive approach that accounts for effects of  
140 both taxa and data inclusion.

141 Systematists are increasingly becoming aware of the fact that although sufficient genomic  
142 and taxonomic samplings are necessary for accurate phylogeny estimation, proper data analysis  
143 is also critical. Accurate reconstruction requires careful navigation of a phylogenetic workflow  
144 that is becoming increasingly complex and sophisticated (reviewed by Lemmon and Lemmon

145 2013). For example, evolutionary processes must be modeled adequately or estimates of  
146 topology and branch lengths may be biased (Posada and Crandall 1998; Lemmon and Moriarty  
147 2004; Brown and Lemmon 2007; Lanfear et al. 2012; Hoff et al. 2016). Second, proper  
148 orthology assessment is essential to avoid including paralogous sequences (Chen et al. 2007;  
149 Lemmon and Lemmon 2013). Third, construction of complete or nearly-complete data matrices  
150 can be important for minimizing the potential effects of missing data (Lemmon 2009; Roure et  
151 al. 2013; Hosner et al. 2015). Finally, a particularly difficult aspect of phylogenomic analysis is  
152 how to accommodate multilocus data with different underlying histories. The traditional  
153 approach has been to concatenate the loci into a single supermatrix in the hope that the signal of  
154 the true underlying species history overwhelms any discrepancies among the individual histories  
155 of the loci sampled (Kluge 1989; de Queiroz and Gatesy 2007). More recently, however, theory  
156 and simulation studies have shown that explicitly accounting for incongruent gene histories (e.g.,  
157 using a coalescent model or networks) can be essential for accurate estimation of species history  
158 (Edwards 2009; Morrison 2011; Mirarab and Warnow 2015; Edwards et al. 2016). Incongruence  
159 among loci has particular bearing on angiosperm systematics because relationships among some  
160 of the key groups change depending upon whether a supermatrix or coalescent (species-tree)  
161 approach is employed (e.g., Wickett et al. 2014; Edwards et al. 2016; Sun et al. 2016), although  
162 it is possible that increased taxon sampling could mitigate these effects. What is currently  
163 lacking is a framework for systematically comparing results from different analysis conditions,  
164 while also considering the sensitivity of these results to particular combinations of taxa and loci  
165 within the data set.

166 Here, we develop and test an angiosperm-wide hybrid enrichment resource for general use  
167 by the angiosperm systematics community in order to facilitate unification of data collection and

168 accelerate resolution within this clade. After identifying 499 target loci with appropriate  
169 characteristics derived from Duarte et al. (2010), we develop a robust AHE probe kit that utilizes  
170 genomic resources from 25 genomes distributed broadly across angiosperms. We demonstrate  
171 the value of this resource for use at deep, intermediate, and shallow scales by carrying out hybrid  
172 enrichment across six orders and 10 plant families, and we incorporate previously published data  
173 to estimate a phylogenetic tree of 30 of the 79 angiosperm orders (APG IV 2016;). Note that our  
174 sampling is designed to provide sufficient taxonomic coverage to evaluate the effectiveness of  
175 the enrichment probes, not to produce a comprehensive phylogeny of angiosperms. Independent  
176 of the phylogenetic data collection, we illustrate the potential for collecting data from functional  
177 loci by including probes for 18 selenium-tolerance loci (Freeman et al. 2010). Finally, we present  
178 results from a sensitivity analysis that will allow for a more systematic distinction between  
179 robust relationships that do not require further study versus tenuous relationships that require a  
180 more thorough investigation. Our goals are to: (1) test the efficiency of the enrichment resource  
181 and its effectiveness in resolving phylogenies and (2) provide a novel framework for evaluating  
182 the robustness of phylogenetic estimates and testing alternative topological hypotheses. The  
183 hybrid enrichment resource we present here is broad both genomically (loci are selected from  
184 throughout the genome; Suppl. Fig. 1) and taxonomically (taxa represented are distributed across  
185 the clade) in order to provide a useful tool for widespread application in angiosperm systematics  
186 studies. A practical demonstration of the application of this methodology to resolving difficult  
187 nodes below the family level is provided in another contribution (Léveillé-Bourret et al., in  
188 review).

189



## 190 **METHODS**

191           The primary objective of this work is to develop an enrichment kit capable of efficiently  
192 collecting a large number of informative nuclear loci across all of angiosperms. A summary of  
193 previous efforts to develop enrichment tools for plants is given in Table 1. Although a handful of  
194 previous researchers have developed enrichment kits for broad taxonomic groups (e.g., eudicots),  
195 their aim has been plastid genomes (Stull et al. 2013). Other researchers have targeted nuclear  
196 loci, but only for specific clades (e.g., *Asclepias*, Weitemier et al. 2014). Moreover, studies  
197 targeting nuclear loci have incidentally recovered plastid genomes as a byproduct of nuclear  
198 enrichment (e.g., Stephens et al. 2015b; Schmickl et al. 2016), suggesting that specifically  
199 targeting plastid genomes may be unnecessary. Our effort builds upon the effort of previous  
200 studies by developing a general angiosperm-wide enrichment resource that targets loci of  
201 moderate conservation distributed across the nuclear genome; we achieve this goal by including  
202 probes from divergent lineages representing the phylogenetic breadth of angiosperms.

### 203 ***Locus Selection and Probe Design***

204           Based on previous experience in vertebrates (Lemmon et al. 2012), including birds (Prum  
205 et al. 2015; Morales et al. 2016), snakes (Pyron et al. 2014; Ruane et al. 2015), lizards (Brandley  
206 et al. 2015; Tucker et al. 2016), fish (Eytan et al. 2015), frogs (Peloso et al. 2016) and  
207 invertebrates, including flies (Young et al. 2016), butterflies/moths (Breinholt et al. *in press*),  
208 spiders (Hamilton et al. 2016), and other taxa, development of an efficient enrichment kit that is  
209 useful across broad taxonomic scales requires careful selection of loci that are of sufficient  
210 length for probe design, relatively free of indels and introns, and of moderate conservation across  
211 the target group. In order to meet these requirements, we began with the 959 genes identified as  
212 single-copy orthologs among *Populus*, *Vitis*, *Oryza*, and *Arabidopsis* by Duarte et al. (2010).

213 Since many of these genes contain introns, we divided these genes into exons using *Arabidopsis*  
214 annotations and retained only those that were at least 150 bp, which is long enough to contain at  
215 least two probes at 1.25 tiling density (i.e. 90 bp overlap; Fig. 1). This process yielded 3050  
216 exons. In order to ensure we were not targeting loci that were too divergent for efficient  
217 enrichment, we removed exons with <55% sequence similarity between *Arabidopsis* and *Oryza*.  
218 The remaining 1721 exons served as our preliminary target loci.

219 In order to ensure that we developed enrichment probes that both represent the breadth of  
220 angiosperm diversity and also ensure that the loci captured are low in copy number across  
221 angiosperms, we leveraged a large set of published and unpublished genomic and transcriptomic  
222 resources. Specifically, we utilized complete genomes from 33 species across angiosperms  
223 (except magnoliids) together with newly obtained genomic data from nine non-model members  
224 of Poales (Table 2; Suppl. Table 1). For each of these species, we identified homologous regions  
225 following Prum et al. (2015), using *Arabidopsis* and *Oryza* as references (>55% similarity to one  
226 of the references was required). We identified the final 499 target loci as those present in >85%  
227 of the 41 reference species and existing in  $\leq 1.2$  copies on average. These loci are distributed  
228 across the *Arabidopsis* genome (Suppl. Fig. 1). After selecting homologous sequences with the  
229 greatest sequence similarity to *Arabidopsis* and *Oryza* orthologs, we aligned sequences and  
230 trimmed the resulting alignments to the exon ends using the *Arabidopsis* and *Oryza* sequences as  
231 a guide. Prior to probe design, we subsampled the alignments to include only 25 species that  
232 more evenly represented angiosperm diversity. The 25 references include *Amborella*, 6 monocot  
233 families, 11 rosid families, 4 asterid families, and 4 non-rosid and non-asterid eudicot families  
234 (Table 2). Inclusion of this large number of references was necessary because enrichment

235 success is inversely related to evolutionary distance of references and target species (Lemmon et  
236 al. 2012; Bi et al. 2013; Sass et al. 2016).

237 In order to test the potential for simultaneously targeting loci of known function in  
238 addition to anchor loci, we incorporated probes targeting 18 selenium-tolerance genes. The 18  
239 genes are candidates for the selenium-tolerance phenotype obtained from a comparative  
240 transcriptome analysis between selenium hyperaccumulator *S. pinnata* and selenium non-  
241 hyperaccumulator *S. elata* (unpublished data) and a macroarray study between *S. pinnata* and *S.*  
242 *albescens* (Freeman et al. 2010). Selenium is atomically similar to sulfur and can be assimilated  
243 into selenocysteine via the sulfur assimilation pathway (Terry et al. 2000). These genes include  
244 sulfur transporters and key enzymes in sulfur assimilation. Alignments for 18 of these genes  
245 were obtained from TAIR (Berardini et al. 2015). Following the methods described above, we  
246 scanned genomic resources for the 25 references species for selenium homologs using  
247 *Arabidopsis* as a reference. Alignments of the homologs were then constructed using MAFFT  
248 (v7.023b; Katoh and Standley 2013) and trimmed as described above.

249 After masking high-copy and repetitive regions, we tiled 120 bp probes across each of the  
250 sequences at 2.8x coverage (neighboring probes overlap by approximately 48 bp). Probes were  
251 synthesized by Agilent Technologies (Santa Clara, CA) to develop the kit hereafter referred to as  
252 the Angiosperm v.1 design. The alignments and probe design are available as Supplemental  
253 Material (Dryad accession XXXX).

#### 254 ***Taxon Sampling***

255 Data were collected from a total of 104 angiosperm species representing 30 orders and 48  
256 families (Suppl. Table 2). For 53 of these species (representing six orders, 10 families, and 21  
257 genera), the Angiosperm v.1 kit was used to enrich genomic DNA for the target regions prior to

258 sequencing. Sequences for the remaining 51 species were obtained from low-coverage genomic  
259 reads (not enriched), assembled transcriptomes, and assembled genomes (Suppl. Table 2).

### 260 *Hybrid Enrichment Data Collection*

261 In order to test the efficiency and utility of the AHE resource described above, we  
262 enriched 53 samples from across the phylogenetic breadth of angiosperms following the general  
263 methods of Lemmon et al. (2012), with adaptations made for plant samples. Genomic DNA was  
264 extracted using the DNEasy Plant Mini Kit (Qiagen, Valencia, California, USA). The protocol  
265 was modified following suggestions (Costa and Roberts 2014) to compensate for frequent low  
266 yields obtained with the standard protocol. After extraction, genomic DNA was sonicated to a  
267 fragment size of ~300-800 bp using a Covaris E220 Focused-ultrasonicator with Covaris  
268 microTUBES. Subsequently, library preparation and indexing were performed on a Beckman-  
269 Coulter Biomek FXp liquid-handling robot following a protocol modified from Meyer and  
270 Kircher (2010). A size-selection step was also applied after blunt-end repair using SPRI select  
271 beads (Beckman-Coulter Inc.; 0.9x ratio of bead to sample volume). Indexed samples were then  
272 pooled at approximately equal quantities (typically 16-18 samples per pool), and then each pool  
273 was enriched using the Angiosperm v.1 kit (Agilent Technologies Custom SureSelect XT kit  
274 ELID 623181). After enrichment, 3–4 enrichment reactions were pooled in equal quantities for  
275 each sequencing lane and sequenced on PE150 Illumina HiSeq 2500 lanes at the Translational  
276 Science Laboratory in the College of Medicine at Florida State University.

### 277 *Paired-Read Merging*

278 In order to increase read accuracy and length, paired reads were merged prior to assembly  
279 following Rokyta et al. (2012). In short, for each degree of overlap each read pair was evaluated  
280 with respect to the probability of obtaining the observed number of matches by chance. The

281 overlap with the lowest probability was chosen if the p-value was less than  $10^{-10}$ . This low p-  
282 value avoids chance matches in repetitive regions. Read pairs with a p-value below the threshold  
283 were merged and quality scores were recomputed for overlapping bases (see Rokyta et al. [2012]  
284 for details). Read pairs failing to merge were utilized but left unmerged during the assembly.

### 285 ***Read Assembly***

286 Divergent reference assembly was used to map reads to the probe regions and extend the  
287 assembly into the flanking regions (Fig. 2; Prum et al. 2015). More specifically, a subset of the  
288 taxa used during probe design were chosen as references for the assembly: *Arabidopsis thaliana*,  
289 *Billbergia nutans*, and *Carex lurida*. Matches were called if 17 bases matched a library of spaced  
290 20-mers derived from the conserved reference regions (i.e., those used for probe design).  
291 Preliminary reads were then considered mapped if 55 matches were found over 100 consecutive  
292 bases in the reference sequences (all possible gap-free alignments between the read and the  
293 reference were considered). The approximate alignment position of mapped reads were estimated  
294 using the position of the spaced 20-mer, and all 60-mers existing in the read were stored in a  
295 hash table used by the de-novo assembler. Simultaneously using the two levels of assembly  
296 described above, the three read files were traversed repeatedly until a pass through the reads  
297 produced no additional mapped reads. For each locus, a list of all 60-mers found in the mapped  
298 reads was compiled and 60-mers were clustered if found together in at least two reads. Contigs  
299 were estimated from 60-mer clusters. In the absence of contamination, low coverage, and gene  
300 duplication each locus should produce one assembly cluster. Consensus bases were called from  
301 assembly clusters as unambiguous base calls if polymorphisms could be explained as sequencing  
302 error (assuming a binomial probability model with the probability of error equal to 0.1 and alpha  
303 equal to 0.05). Otherwise ambiguous bases were called (e.g., 'R' was used if 'A' and 'G' were

304 observed). Called bases were soft-masked (made lowercase) for sites with coverage lower than  
305 five. Assembly contigs derived from less than 10 reads were removed in order to reduce the  
306 effects of cross contamination and rare sequencing errors in index reads. Scripts used in the  
307 assembly process are available on Dryad (accession XXXX).

### 308 *Orthology Estimation*

309       After grouping homologous sequences obtained by enrichment and whole genomes,  
310 putative orthologs were identified for each locus following Prum et al. (2015). For each locus,  
311 pairwise distances among homologs were computed using an alignment-free approach based on  
312 percent overlap of continuous and spaced 20-mers. Using the distance matrix, sequences were  
313 clustered using the neighbor-joining algorithm, but allowing at most one sequence per species to  
314 be present in a given cluster. Note that flanks recovered through extension assembly contain  
315 more variable regions and allow gene copies to be sorted efficiently. Gene duplication before the  
316 ancestor of the clade results in two distinct clusters that are easily separated. Duplication within  
317 the clade typically results in two clusters, one containing all of the taxa and a second containing a  
318 subset of the taxa (missing data). Gene loss also results in missing data. In order to reduce the  
319 effects of missing data, clusters containing fewer than 50% of the species in the taxon set were  
320 removed from downstream processing.

### 321 *Alignment and Trimming*

322       Putatively orthologous sequences were processed using a combination of automated and  
323 manual steps in order to generate high quality alignments in a reasonable amount of time.  
324 Sequences in each orthologous cluster were aligned using MAFFT v7.023b (Kato and Standley  
325 2013), with --genafpair and --maxiterate 1000 flags utilized. The alignment for each locus was  
326 then trimmed/masked using the steps from Prum et al. (2015). First, each alignment site was

327 identified as "conserved" if the most commonly observed character state was present in > 40% of  
328 the sequences. Second, using a 20 bp window, each sequence was scanned for regions that did  
329 not contain at least 10 characters matching to the common state at the corresponding conserved  
330 site. Characters from regions not meeting this requirement were masked. Third, sites with fewer  
331 than 12 unmasked bases were removed from the alignment. A visual inspection of each masked  
332 alignment was carried out in Geneious version 7 ([www.geneious.com](http://www.geneious.com); Kearse et al. 2012).  
333 Regions of sequences identified as obviously misaligned or non-homologous were removed.

### 334 *Phylogeny Estimation*

335 Adequate modeling of sequence evolution is an important prerequisite for accurate  
336 phylogenetic estimation (Hillis et al. 1994; Yang 1994; Posada and Crandall 1998; Lemmon and  
337 Moriarty 2004; Ripplinger and Sullivan 2008; Lanfear et al. 2012; Hoff et al. 2016). Site  
338 partitioning is one aspect of modeling that has recently gained appreciation (Brown and Lemmon  
339 2007; Lanfear et al. 2012; Darriba and Posada 2015; Frandsen et al. 2015). When the loci being  
340 modeled are from protein coding regions, some authors choose to partition by codon position and  
341 remove third codon positions in order to reduce the effects of substitutional saturation (e.g.,  
342 Breinholt and Kawahara 2013; Wickett et al. 2014; Frandsen et al. 2015). Although the anchored  
343 loci we target here were derived from protein-coding exonic regions, partitioning by coding  
344 position would not be sufficient because captured flanks could contain intronic and intergenic  
345 regions that are also likely to vary both by model and rate of evolution. Moreover, the degree of  
346 saturation and its effects on downstream analyses depend heavily on the phylogenetic breadth  
347 and depth of sampling. Consequently, we used an agnostic approach to site partitioning that does  
348 not rely on a prior knowledge of possible site partitions. More specifically, we used  
349 PartitionFinder v2.0.0-pre14 (Frandsen et al. 2015), which utilizes a k-means approach to

350 partition sites into clusters based on similarity with respect to model of sequence evolution  
351 (including rate). This approach produces partitioning schemes that fit alignments better than  
352 schemes determined by methods requiring definition of *a priori* partitions (e.g., by codon  
353 positions and locus boundaries; Frandsen et al. 2015). An added benefit to using this approach is  
354 that it produces estimates of site-specific rates of evolution.

355 In order to allow for estimation of trees under both coalescent and supermatrix  
356 approaches, RAxML v8.1.21 (Stamatakis 2014) was used to estimate gene trees from individual  
357 locus alignments and also the concatenated supermatrix (GTRGAMMA model, partitioned as  
358 described above, with -f -a flags). In each case, *Amborella* was specified as the outgroup, and  
359 100 rapid bootstrap replicates were collected in order to measure support for the maximum  
360 likelihood estimate. All other parameters remained at default settings. Species trees were  
361 estimated in ASTRAL-II v.4.9.7 (Mirarab and Warnow 2015) using bootstrap replicates from the  
362 RAxML-estimated gene trees.

### 363 ***Evaluating the Size and Variability of Flanking Regions for Family- and Genus-Level Clades***

364 One feature of AHE is that data collected by the approach can be useful at both deep,  
365 intermediate, and shallow timescales. Recall that in order to ensure efficient enrichment across  
366 deep time scales, regions targeted by the enrichment kit described above consist of moderately  
367 conserved exons. Consequently, flanking regions are expected to contain intronic and intergenic  
368 sites that may only be accurately aligned at shallower taxonomic scales. We expect, therefore,  
369 that the majority of flanking bases would be filtered out when the angiosperm-wide alignment is  
370 trimmed. In order to study the effect of phylogenetic depth on the size of usable flanks, we also  
371 performed the post-assembly analysis steps on subsamples of the taxa. More specifically, we  
372 performed orthology assessment and constructed trimmed alignments specific to the following



373 clades: Cyperaceae (21 samples), Caryophyllales (5 samples), Dipsacales (6 samples), *Magnolia*  
374 (7 samples), *Protea* (4 samples), and *Stanleya* (5 samples). The size and variation of flanking  
375 regions for these alignments was compared to corresponding sections of the angiosperm-wide  
376 alignment.

### 377 ***Assessing Robustness of Phylogenetic Estimates***

378 Phylogenetic estimates can be highly sensitive to not only the model of evolution  
379 assumed, but also the choice of data being analyzed (Ripplinger and Sullivan 2008; Wickett et al.  
380 2014; Hosner et al. 2015; Simmons et al. 2016). Inclusion of saturated sites and/or outlier loci,  
381 for example, can have particularly profound effects on phylogenetic estimates (Breinholt and  
382 Kawahara 2013; Simmons et al. 2016). These effects can result in conflict among studies,  
383 especially for phylogenetic relationships that are particularly difficult (e.g., the relationships  
384 among eudicots, monocots, and magnoliids). Given this difficulty, it is surprising that more  
385 authors do not present results from a more exhaustive exploration of the effects of their data  
386 selection on their estimates of phylogeny.

387 Here, we present an approach to evaluate the robustness of phylogenetic estimates to  
388 differential character and taxon sampling (Fig. 3; all scripts available in Dryad). Although we  
389 focus on the effects of variation in sampled loci included, other aspects of the data set and  
390 analysis could also be incorporated (e.g., taxon sampling). The approach begins by  
391 independently varying two or more aspects of the data set or analysis. In this case we varied both  
392 the sites included at each locus and also the loci included. We ordered the sites based on  
393 evolutionary rate and the loci based on similarity to other loci estimated via gene tree distances;  
394 then we analyzed the data with successively less variable and less distant loci included (see  
395 details below). Data sets generated under each of these conditions were then used to estimate the

396 phylogeny and support values inferred using both supermatrix and coalescent approaches. The  
397 novel aspect of this approach is the representation of the resulting support values for particular  
398 nodes as heat maps in the parameter space defined by the aspects of the data set or analysis that  
399 we varied.

400 High evolutionary rate estimates can result from alignment error, substitutional  
401 saturation, and convergent evolution of base composition. Removal of the sites with highest  
402 estimated rates can improve the support for the topology by removing noise from the data set  
403 (Castresana 2000; Talavera and Castresana 2007; Xia and Lemey 2009). Removing too many  
404 sites, however, will eventually result in loss of signal and subsequently in poorly supported  
405 topologies. In some cases, conversely, the most rapidly evolving sites contain strong  
406 phylogenetic signal, and so removing these sites may actually reduce branch support values.  
407 Given the difficulty in knowing *a priori* which rate threshold optimizes this tradeoff for a  
408 particular data set, a useful approach is to test several thresholds along a continuum. We utilized  
409 site-specific rates estimated by PartitionFinder v2.0.0-pre14 from a concatenated matrix  
410 containing all loci using the kmeans option (default settings otherwise; Frandsen et al. 2015).  
411 Fourteen site inclusion thresholds along the observed distribution were then chosen based on the  
412 following percentiles: 100%, 99%, 97%, 95%, 92%, 89%, 86%, 82%, 76%, 70%, 63%, 54%,  
413 43%, and 31%. These thresholds progressively remove sites such that our test would be more  
414 sensitive to high levels of site inclusion. Based on preliminary tests with this data set, we  
415 expected phylogenetic support to deteriorate rapidly when less than 63% of sites were included.  
416 New locus-specific alignments were then constructed based on each of these site inclusion levels,  
417 and gene trees were estimated for each of these data sets using RAxML as described above (14  
418 estimated gene trees per locus; Fig. 4a).

419 Inclusion of loci with insufficient signal can result in imprecise or inaccurate estimates of  
420 species trees (Hosner et al. 2015; Simmons et al. 2016). Moreover, inclusion of loci with  
421 estimated gene-tree-histories that are substantially different than the underlying species history  
422 can also result in imprecise or inaccurate estimates of species trees (Meredith et al. 2011;  
423 Townsend et al. 2011; Simmons and Gatesy 2015; Simmons et al. 2016; Springer and Gatesy  
424 2016). Therefore, removal of outlier gene trees may result in more accurate and precise species  
425 trees. As with inclusion of sites, however, inclusion of too many loci will eventually result in  
426 reduced accuracy, precision, and support. In order to identify the level of locus inclusion that  
427 maximizes accuracy and precision, we tested several thresholds along a continuum. For each of  
428 the 14 sets of gene trees described above, pairwise tree distances were estimated using treeCmp  
429 (v1.0-b29; Bogdanowicz et al. 2012), via the triple metric for rooted trees (tt option; Critchlow et  
430 al. 1996). The resulting matrix of pairwise tree distances was visualized using multidimensional  
431 scaling using the R package plotrix version 3.6-2 (Fig. 4b; (Fig. 3; from Lemon [2006]).  
432 Euclidian distance from each tree to the center of the trees was then used to rank the loci, with  
433 the greatest distance (i.e., greatest outlier) having the highest rank. Fourteen locus-inclusion  
434 thresholds were then applied: 384, 381, 374, 363, 348, 329, 306, 279, 248, 213, 174, 131, 84, and  
435 33 loci. These thresholds were chosen to cover a broad range of locus inclusion levels, but still  
436 allow the effects of removing small numbers of outliers to be studied. These 14 locus-inclusion  
437 thresholds were applied to each of 14 site-inclusion thresholds described above (Fig. 4d).  
438 Phylogenies were then inferred using each of the 196 combinations in RAxML and ASTRAL-II,  
439 using corresponding concatenated matrices and gene trees sets, respectively.

440 The primary goal of the extensive analyses described above is to produce a mechanism  
441 for visualizing the sensitivity of phylogenetic estimates to variation in site and locus inclusion.

442 To this aim, nodal support for trees at each filter level were estimated using the R package ape  
443 (Paradis et al. 2004) with the “prop.clades” command, which counts the number of times the  
444 bipartitions present in a reference tree are present in a list of trees. After selecting a reference tree  
445 (the best tree from the full unfiltered data set), the occurrence of a clade in the bootstrap trees  
446 was assessed for each of the 196 ASTRAL-II and 196 RAxML concatenated analyses. This step  
447 produced support values for each combination of thresholds at each node in the reference tree.  
448 Heat maps were then constructed for each internal node in the reference tree (Fig. 4c). Note that  
449 alternate reference trees can be used to generate heat maps representing support for alternative  
450 hypotheses.

#### 451 *Testing Alternative Hypotheses*

452 The large number of estimates produced by the above procedure provides an opportunity  
453 to test alternative phylogenetic hypotheses and alternative phylogeny estimation approaches  
454 across a broad range of conditions. To demonstrate the potential for testing alternative  
455 phylogenetic hypotheses, we focused on the relationship between eudicots, monocots, and  
456 magnoliids that has been debated in the literature (Lee et al. 2011; Soltis et al. 2011; Burleigh et  
457 al. 2011; Wickett et al. 2014). Specifically, support values represented by heat maps  
458 corresponding to support for the three alternative relationships among these clades (magnoliids-  
459 monocots sister, eudicots-monocots sister, and magnoliids-eudicots sister) were compared using  
460 randomization tests as follows. Average support across all analysis conditions (a heat map) was  
461 computed for each of the three relationships. A test statistic was then computed as the difference  
462 between the mean support (across analysis conditions) for two alternative relationships. To  
463 generate a null distribution with which to compare the test statistic, support values found in heat  
464 map matrices were then randomized the relevant pair of matrices, while keeping the analysis

465 condition constant. In other words, the two support values (one for each relationship) for a given  
466 analysis condition were randomized with respect to the matrix in which they were placed. After  
467 randomizing, the difference between the means of the two randomized matrices was computed as  
468 a value in the null distribution. This process was repeated 10,000 times to generate the null  
469 distribution. To demonstrate the potential for testing support given by alternative analysis  
470 methods, we used the randomization test described above, but instead used matrices derived  
471 from the supermatrix (RAxML concatenated) and species tree (ASTRAL-II) analyses.

472 We also tested the hypothesis that support produced by the species tree approach is more  
473 robust to variation in data sets than the support produced under the supermatrix approach (Song  
474 et al. 2012; Edwards et al. 2016). In particular, we compared the overall sensitivity as the  
475 variance in support values across analysis conditions, averaging the variance across nodes (a  
476 value of zero indicates high robustness). We then computed the test statistic as the difference  
477 between the sensitivity measure for the coalescent and supermatrix (with supermatrix -  
478 coalescent  $> 0$  indicating support that the coalescent approach is more sensitive to changes in  
479 analysis conditions). Ten thousand points from the null distribution were computed by shuffling  
480 corresponding support values between coalescent- and supertree-derived matrices, before  
481 recomputing the test statistic.

482 In addition to the randomization tests described above, we performed more traditional  
483 hypothesis tests using point estimates of phylogeny from the analyses of the full data set. The  
484 best-constrained trees for each topology were estimated in RAxML using the -g option under a  
485 GTRGAMMA model. The per-site log likelihoods for the three best constrained trees were  
486 written to file and loaded in the CONSEL (v0.1i) program (Shimodaira and Hasegawa 2001).  
487 This program ranks alternative hypotheses in order of the likelihood via p-value calculated from

488 the multi-scale bootstrap using several tests including the widely used Shimodaira–Hasegawa  
489 (SH) and the approximately unbiased (AU) test (Shimodaira and Hasegawa 2001; Shimodaira  
490 2002).

491

## 492 **RESULTS**

### 493 ***Locus Selection and Probe Design***

494 The procedure followed for locus selection (Fig. 1) yielded a large number of target loci,  
495 with minimal missing data and optimal levels of sequence variation for hybrid-enrichment-based  
496 phylogenomics. Target probes were designed for 499 anchor loci and 18 functional loci (517 loci  
497 in total). Alignments of sequences for the 25 reference species averaged 343 sites per target locus  
498 (range: 124 to 2176 sites) and contained only 10% missing characters. Sequence variation in  
499 target regions was moderate: 62% of the sites were variable, 51% of the sites were parsimony  
500 informative, pairwise sequence divergence averaged 27%, and maximum pairwise sequence  
501 divergence within loci averaged 39%. The probe design contained a total of 56,862 probes (~4.4  
502 probes per species per locus; See Supplemental Materials).

### 503 ***Hybrid Enrichment***

504 The probe kit developed above performed well on the 53 test samples taken from across  
505 angiosperms; >90% of target loci were obtained for 90% of the samples (Table 3). Over 91  
506 billion nucleotides were sequenced on the two PE150 Illumina lanes. Assemblies resulted in  
507 recovery of an average of 470 loci (91%) with contigs longer than 250 bp. The average  
508 consensus sequence recovered was 764 bp, more than twice the length of average probe region  
509 (343 bp). On average, 14% of reads mapped to target plus flanking regions (i.e., were  
510 incorporated in the assemblies). As expected, capture efficiency was lower for taxa more

511 evolutionary divergent from reference sequences (Fig. 5). For example, an average of only 329  
512 loci were recovered for members of Piperales, which shares an ancestor with the closest  
513 reference 124 million years ago (Magallón et al. 2013). In contrast, for members of Brassicales  
514 (sharing a common ancestor with the closest reference 24 million years ago), an average of 512  
515 loci were recovered.

## 516 *Alignments*

517 For the angiosperm taxon set, a large number of loci were retained through the post-  
518 assembly pipeline. More specifically, 384 alignments containing orthologous sequences were  
519 obtained (available as Supplemental Material). The final concatenated angiosperm alignment  
520 contained 138,616 bases. In general, alignments contained a modest amount of missing data (7%  
521 if missing taxa were excluded, 22% if missing taxa were included). The number of missing taxa  
522 varied among loci (mean=15, range=2-40). Note for the angiosperm-wide alignments, flanks  
523 were typically trimmed off because they contained non-homologous or unalignable bases at this  
524 deep scale (see below for intermediate- and shallow-clade alignments). As these alignments  
525 contain primarily probe regions, it is not surprising that final, trimmed alignments were only  
526 slightly longer than the alignments used to design probes (360 vs. 343, respectively). Also note  
527 that none of the 18 functional loci were retained for the angiosperm-wide taxon set.

528 For the intermediate and shallow-clade taxon sets, an even larger number of loci was  
529 retained through the post-assembly pipeline (Table 3). An average of 410 alignments containing  
530 orthologous sequences were obtained (range 189 to 540). Because they contained flanking  
531 regions, alignments for these genus-level taxon sets were substantially longer (68% longer on  
532 average) than those of the angiosperm-level taxon set (Table 4). Concatenated alignments  
533 averaged 233,993 bases (107,918 to 365,941), and locus-specific alignments averaged 577 bases

534 (375 to 670). Remarkably, all taxa were present for each of the final locus sets, indicating that  
535 missing data/taxa in the angiosperm-wide alignments resulted from differences in locus recovery  
536 across families. One indication of this cause is the consistent absence of some target loci in  
537 Piperales and Proteales, in which only 189 and 159 orthologous loci were retained, respectively.  
538 As a result of the increased length and variability of the loci, support for the intermediate and  
539 shallow-scale clades improved (Suppl. Figs. 2-6). Although the estimated topologies remained  
540 unchanged, half of the nodes that did not receive full support (100% bootstrap) in the  
541 Angiosperm-wide alignment became fully supported by the intermediate and shallow-scale  
542 alignments.

543         One reason why a greater number of orthologous loci were retained for the intermediate  
544 and shallow taxon sets is that orthology could more easily be established for duplicated genes.  
545 For example, most of the functional locus targets contained multiple copies (average 2.16; Table  
546 3). At one functional target locus in Proteaceae, in fact, 14 orthologs were identified. Multi-copy  
547 loci such as these were removed from the angiosperm-wide taxon set during the  
548 orthology/trimming process because copy number for these loci varied wildly across genera (i.e.,  
549 multiple independent duplications resulting in these copies occurred within angiosperms).  
550 Brassicales, in which many species have high selenium tolerance (likely due to the propensity for  
551 sulfur accumulation and assimilation into unique sulfur-containing compounds), produced the  
552 greatest number of orthologous alignments (n=574).

### 553 ***Robustness of Phylogenetic Estimates***

554         Although the majority of the angiosperm relationships were unequivocally supported  
555 across the majority of analysis conditions, some relationships were less robust to variation in  
556 levels of data filtering and/or method of phylogeny estimation. The robustness of each estimated



557 node is shown as a heat map in Figure 6, which provides not only a comprehensive view of  
558 support across many angiosperms orders, but also a clear indication of which relationships are  
559 only supported under specific conditions. Many nodes were well supported in all but the most  
560 extreme thresholds for site and locus removal (i.e., >60% of sites removed and/or >60% loci  
561 removed). Overall, support values were consistent between coalescent and supermatrix  
562 approaches as long as more than ~100 loci were included. Nonetheless, support for several nodes  
563 varied wildly across analysis conditions, with highest support occurring when a moderate to  
564 large numbers of sites or loci were removed.

565         For the relationship of particular interest, that between monocots, eudicots and  
566 magnoliids, support for alternative arrangements were highly dependent upon the level of site  
567 filtering, the level of locus filtering, and also the approach to phylogeny estimation (Fig. 7).  
568 Coalescent-based analyses supported the eudicots-monocots sister hypothesis with moderate to  
569 high support for the majority of site- and locus-filtering conditions. Support for the other two  
570 arrangements was almost entirely lacking, regardless of the level of site- and locus-filtering.  
571 Conversely, supermatrix-based analyses strongly supported the eudicots-magnoliids sister  
572 relationship when all data were included, but strongly supported the eudicots-monocots sister  
573 relationship when 54–76% of the most rapidly evolving sites were removed.

#### 574 *Testing Alternative Hypotheses*

575         Statistical tests indicated that the eudicots and monocots sister relationship was the best-  
576 supported alternative (compared to eudicots-magnoliids sister and compared to monocots-  
577 magnoliids sister) when results were averaged across all site- and locus-filtering levels. This  
578 result was obtained regardless of whether a coalescent (test statistic eudicots-monocots vs.  
579 eudicots-magnoliids = 25.09; eudicots-monocots vs. monocots-magnoliids = 52.88;  $p < 0.0001$ ,

580 both tests) or supermatrix (test statistic eudicots-monocots vs. eudicots-magnoliids = 42.63  
581 eudicots-monocots vs. monocots-magnoliids = 24.83;  $p < 0.0001$ , both tests) approach was  
582 applied. This result may seem somewhat surprising given the inconsistent support generated by  
583 the supermatrix and coalescent approaches for this node (Fig. 7). Recall, however, that strong  
584 support for the eudicots-magnoliids sister hypothesis was only found in the narrow condition in  
585 which >95% of the sites were included in the supermatrix analysis. Support for alternative  
586 relationships of these taxa was found to be more sensitive to data filtering when the supermatrix  
587 instead of the coalescent approach was employed (test statistic = 38.69,  $p < 0.0001$ ). The  
588 approximately unbiased (AU) test (Shimodaira and Hasegawa 2001) rejected the monocots-  
589 magnoliids sister hypothesis ( $p = 0.015$ ), but failed to reject the eudicots-magnoliids sister  
590 hypothesis ( $p = 0.119$ ).

591         Although estimates based on supermatrix and coalescent approaches were found to be at  
592 odds for some of the difficult nodes for some data-filtration levels, estimates based on the two  
593 approaches were quite consistent overall as long as ~150 or more loci were included. For  
594 example, analysis of the full dataset under the supermatrix and coalescent approaches yielded  
595 identical topologies within monocots and magnoliids (some topological differences were evident  
596 within eudicots, however). Interestingly, inclusion of more than 150 loci did not appear to  
597 improve the consistency of estimates between supermatrix and coalescent approaches.

598

## 599 **DISCUSSION**

600         The anchored hybrid enrichment resource developed here provides systematists with the  
601 means to collect hundreds of phylogenomic loci for resolving species relationships across  
602 angiosperms. By leveraging available genomic resources we have developed an enrichment

603 resource containing probes that represent much of the ordinal-level diversity within angiosperms,  
604 which facilitates efficient enrichment of up to 499 anchor loci. The targeted anchor loci are  
605 sufficiently conserved to allow enrichment in most groups within the clade, yet are still contain  
606 enough variation to robust resolution of the large majority of nodes at a broad range of  
607 phylogenetic scales. For instance, Léveillé-Bourret et al. (in review) demonstrate the success of  
608 the methodology in resolving the most difficult nodes of a rapid Cyperaceae radiation involving  
609 thousands of species. Our data indicate that resolution at intermediate and shallow scales is  
610 improved by including sequence data from flanking regions around the probe region because the  
611 flanks contain a greater degree of variation. Given the broad taxonomic span, this resource has  
612 the potential to unify the field of angiosperm systematics by providing a common set of nuclear  
613 loci that have a high level of phylogenetic information across evolutionary scales. In fact, the  
614 angiosperm probe v.1 kit has already been widely adopted through 21 ongoing collaborations to  
615 collect data from 87 angiosperm families for more than 2000 taxa (as of October 2016) at the  
616 Center for Anchored Phylogenomics ([www.anchoredphylogeny.com](http://www.anchoredphylogeny.com)).

617 Our results indicate that the anchor loci targeted by the angiosperm enrichment probes  
618 contain a sufficient amount of data to resolve relationships at a broad set of taxonomic scales.  
619 More than 75% of the nodes in this angiosperm-wide test were strongly supported under a broad  
620 range of conditions as long as at least 60% of the sites and 25% of the loci were included. Of the  
621 remaining nodes, only a small minority required hundreds of loci to achieve strong support.  
622 Léveillé-Bourret et al. (in review) found highly similar results in a tribal-level study, with the  
623 backbone topology stabilizing and support peaking with 100–200 loci in both concatenation and  
624 coalescent-based analyses. This pattern is not surprising given results from simulations  
625 indicating that only a few informative loci are needed to resolve easy nodes and a few hundred

626 informative loci are sufficient to resolve more difficult nodes (Leaché and Rannala 2011).  
627 Despite the robustness of support for the majority of nodes, support values for some nodes were  
628 quite sensitive to the number of loci included, the number of sites included, and/or the analysis  
629 approach employed (supermatrix or coalescent). In most of these cases, the support peaked when  
630 an intermediate number of loci were included, suggesting that increasing the number of targeted  
631 loci beyond 499 may have a small effect on the accuracy or precision of estimates. Focusing  
632 resources on other aspects of study design, such as density of taxon sampling or increasing locus  
633 lengths, may prove to be more fruitful (Zwickl and Hillis 2002; Betancur-R. et al. 2014; Peloso  
634 et al. 2016; Simmons et al. 2016). For very shallow and/or rapidly-radiating groups, for example,  
635 robust estimates may require increased locus lengths in order to ensure well-resolved and well-  
636 supported gene trees. One approach to improve gene tree resolution for shallow-scale studies is  
637 to extend probe regions into flanks using low-coverage genome data; based on our experience,  
638 >15x coverage is typically necessary. We have had good success with this approach in orchids  
639 (Gravendeel, et al., *in prep*), lobelias (Givnish et al., *in prep*), lilies (Givnish et al., *in prep*), and  
640 goldenrods (Beck et al. *in prep*). The extended loci contain more variable regions and yield more  
641 strongly supported gene and species trees. Extending anchor loci is often preferable to targeting  
642 anonymous loci because inclusion of the anchor regions allows the data to also be useful for  
643 broad-scale meta-studies.

644         Despite our efforts to incorporate genomic resources from across angiosperms, enrichment  
645 efficiency could be improved further in underrepresented regions of the tree (e.g., magnoliids  
646 and basal eudicots). Fortunately, it is fairly straightforward to improve the resource by  
647 incorporating additional probes representing additional taxa as genomic resources become  
648 available. For example, as part of the orchid, lobelia, and lily projects described above, we have

649 added probes to improve the Angiosperm v.1 kit. In each of these cases, inclusion of the  
650 additional probes substantially increased enrichment efficiency for samples from those groups  
651 (Lemmon et al., unpub. data).

652 The heat map approach representing robustness of phylogenetic estimates is useful in  
653 several contexts. First and foremost, it is a useful means to separate nodes with tenuous support  
654 from those with robust support. As seen with several difficult nodes in the angiosperm tree, high  
655 support values occurring under a narrow range of conditions (e.g., no site or locus filtering) has  
656 the potential to be misleading, since alternative hypotheses can be supported across a broader  
657 range of conditions. Second, the approach provides a framework for testing the robustness and  
658 consistency of alternative methods of data analysis (e.g., supermatrix and coalescent). For the  
659 monocot-eudicot-magnoliid split, for example, our results support the claim of Edwards et al.  
660 (2016) that the supermatrix approach has the tendency to produce confident yet conflicting  
661 results in different regions of parameter space, although other interpretation are possible  
662 (Simmons and Gatesy, 2016). In contrast, while the coalescent approach tends to require more  
663 data to attain high support for a hypothesis, it has a much lower tendency to produce conflicting  
664 results under different conditions. Given the potential for obtaining strong but unstable support  
665 under some conditions, we recommend utilization of the heat map approach we develop here to  
666 ensure more thorough analyses in difficult regions of the tree. Adoption of the heat-map  
667 approach may temper the claims of systematists favoring relationships that appear to be strongly  
668 supported yet are sensitive to analysis conditions or the particular choice of sites and loci to  
669 include in their dataset.

670 We made a substantial effort to target only low-copy loci when developing the AHE  
671 resource. Use of low-copy loci in hybrid enrichment-based phylogenomics is especially

672 important because probes enrich not only the target regions, but also regions with moderate to  
673 high sequence similarity to the target regions. Paralogous gene regions will be enriched to a  
674 degree inversely proportional to their evolutionary divergence from the target region (Lemmon et  
675 al. 2012). In order to minimize potential error arising when enriched sequences are assessed for  
676 orthology, we estimated copy number in 45 divergent angiosperms species prior to selecting  
677 target loci for the Angiosperm v.1 design. Use of a much smaller set of taxa tends to result in an  
678 over-fitting problem wherein the taxa happen by chance to each have a single copy for some  
679 portion of loci (e.g., due to coincidental gene loss). Unsurprisingly, many of the loci previously  
680 identified as low copy based on only four taxa (*Arabidopsis*, *Populus*, *Vitis*, and *Oryza*; Duarte et  
681 al. 2010) were found to have a moderate to high number of copies in other angiosperm species  
682 (Table 3). This finding largely explains why many of the initial 959 loci identified by Duarte et  
683 al. (2010) were removed from our locus list as we refined our target set to 499 loci. The potential  
684 for over-fitting is especially likely in taxa with a history of whole genome duplications and  
685 subsequent gene loss (Glasauer and Neuhauss 2014) . In teleost fishes, for example,  
686 identification of a substantial number of single-copy hybrid enrichment targets proved to be  
687 impossible despite work by Li et al. (2007), who identified 154 putatively single copy loci. In  
688 this case, Stout et al. (*in press*) circumvented this problem by developing a teleost-wide  
689 enrichment kit that targets up to six homologous copies per locus and then sorting out the gene  
690 copies into orthologs bioinformatically after sequencing. Analysis of enriched loci in teleosts and  
691 other taxa with extensive gene duplications/losses may require simultaneous estimation of  
692 speciation and duplication history (Cui et al. 2006; De Smet et al. 2013).

693 Many of the published studies utilizing hybrid enrichment in angiosperms have targeted  
694 the plastome, either exclusively or in combination with nuclear loci (Table 1). One challenge

695 with simultaneously targeting the plastome and nuclear genome is overcoming the unequal  
696 coverage resulting from the large disparity in copy number between the two genomes. Some  
697 researchers desiring data from both genomes have mitigated the coverage disparity by  
698 performing two separate enrichments using kits designed separately for the two genomes  
699 (Heyduk et al. 2016; Sass et al. 2016). While this approach can be successful, it is more  
700 expensive and time consuming than AHE, and it also requires some knowledge of approximate  
701 plastid copy number. An alternative approach that has only recently been discovered is to take  
702 advantage of the fact that enrichment of nuclear targets is not perfectly efficient. Since some  
703 fraction of the sequenced library fragments are from off-target regions, it is reasonable to expect  
704 that some portion of this by-catch will be derived from the plastid genome. Indeed, one can often  
705 assemble whole plastid genomes from the enrichment by-catch (Weitemie et al. 2014; Stephens  
706 et al. 2015a, 2015b; Schmickl et al. 2016). Although the success of this approach depends on  
707 plastome copy number and enrichment efficiency of targeted nuclear loci, the levels of  
708 enrichment we obtained across angiosperms (2%-22% on target; Table 3) suggest that the by-  
709 catch of AHE in angiosperms is likely to contain sufficient plastome sequence reads to enable  
710 reliable reconstruction of whole plastid genomes. Note, however, that this expectation may not  
711 be met when target taxa are very closely related to one of the 25 references used to develop the  
712 probes, since enrichment efficiency in these taxa is expected to be highest. Although  
713 reconstruction of plastid genomes is not a focus of this study, the raw reads generated during  
714 enrichment of the 53 taxa used in this study could be mined for plastid genomes. For example,  
715 using a reference species from the clade as a guide, assemblies were easily constructed for the  
716 plastid genome in Cyperaceae (Buddenhagen, unpubl. data).

717           The diversification of angiosperm lineages continues to be debated despite the  
718 application of large genomic data sets and sophisticated phylogenetic models, leading some to  
719 wonder if we are closer to resolving Darwin's (1903) "abominable mystery". Our study  
720 demonstrates that despite the conflict in recent studies of deep angiosperm relationships (e.g.,  
721 Duarte et al. 2010; Lee et al. 2011; Wickett et al. 2014), one hypothesis predominates (eudicots-  
722 monocots sister) over the majority of parameter space under both supermatrix and species tree  
723 methods of inference. This relationship is supported by the most recent studies focusing on the  
724 plastid genome (Moore et al. 2007; Soltis et al. 2011; Ruhfel et al. 2014) and the Angiosperm  
725 Phylogeny Group's recent synthesis (APG IV 2016). The predominance of one hypothesis is not  
726 obvious at first glance, however, because an alternative hypothesis (i.e., eudicots-magnoliids  
727 sister) is strongly supported under a narrow but commonly chosen set of conditions (supermatrix  
728 with < 5% of sites removed). The placement of Malpighiales within the Malvids has also been  
729 debated (APG IV 2016). Despite support for alternative placement of Malpighiales by the  
730 Angiosperm Phylogeny Group, our analysis suggests robust support for Malpighiales within  
731 Malvids across a broad range of conditions. Our heat map-based analyses of robustness  
732 indicates that the differences between alternative studies of these and other deep angiosperm  
733 relationships could be reconciled through more detailed exploration of the sensitivity of each  
734 study's findings to the particular conditions under which these studies were conducted. One  
735 especially interesting extension to the study presented herein would be to incorporate the degree  
736 of taxon sampling into the analysis of robustness, especially with respect to inclusion of the early  
737 branching taxa that were admittedly under-sampled in this study.

738           The taxa sampled in this study were chosen to allow the enrichment efficiency of the  
739 probe kit and the phylogenomic signal to be assessed at deep, intermediate, and shallow scales.



740 Data from additional taxa were obtained from available genomic resources in order to increase  
741 the coverage across the angiosperm clade. The phylogeny estimated using these samples was  
742 useful for demonstrating the utility of the heat map approach at identifying robust phylogenetic  
743 estimates and for testing alternative hypotheses. Nonetheless, the taxon sampling could certainly  
744 be improved especially for basal lineages. Although the sensitivity of the phylogenetic estimates  
745 to differential taxon sampling could be assessed using the heat map approach, such an analysis is  
746 outside the scope of this paper, and so we leave this effort for future studies.

747

#### 748 **CONCLUDING REMARKS**

749 The anchored enrichment resource we developed provides an efficient way of obtaining a  
750 sufficient amount of phylogenomic data for deep, intermediate, and shallow angiosperm studies.  
751 Although most angiosperm relationships could be robustly resolved, support for a small minority  
752 of relationships varied substantially depending on the particular subset of sites and loci analyzed,  
753 suggesting that the sensitivity approach we developed here may helpful for avoiding false  
754 confidence in hypotheses that supported under only a narrow set of conditions. Use of this  
755 holistic approach may enable systematists to reconcile differences across studies as they work  
756 towards a unified understanding the history of angiosperm diversification.

757

#### 758 **ACKNOWLEDGEMENTS**

759 We are grateful to Alyssa Bigelow, Kirby Birch, Ameer Jalal, and Sean Holland at FSU's  
760 Center for Anchored Phylogenomics for assistance with molecular data collection and  
761 bioinformatics analysis. We are also grateful to Roger Mercer and Yanming Yang at FSU's  
762 College of Medicine for sequencing services. This research was partially funded by NSF DDIG

763 (DEB-1311150) to CEB and by a FSU Planning Grant awarded to ARM. EML acknowledges  
764 support from NSF DEB-1120516. ARL and EML were supported by NSF IIP-1313554. CP  
765 would like to acknowledge the generous support of the Hermon Slade Foundation, Emily  
766 Holmes Memorial Scholarship; Hansjörg Eichler Scientific Research Fund; Systematics  
767 Research Fund, without which research material used in this publication would not have been  
768 collected. NM was supported by NSF DEB-1046328. SW thanks the TU Dresden and especially  
769 Christoph Neinhuis for continuous support. AM was supported by NSF DEB-1252901 to EJE.  
770 PSS is grateful for support from iDigBio (NSF grant EF-1115210) and a Dimensions of  
771 Biodiversity grant (DEB-1442280).

772

#### 773 **LITERATURE CITED**

- 774 APG IV 2016. An update of the Angiosperm Phylogeny Group classification for the orders and  
775 families of flowering plants: APG IV. Bot. J. Linn. Soc. 181:1–20.
- 776 Bakker F.T. 2015. DNA sequences from plant herbarium tissue. In: Appelhans M.S., Hörandl E.,  
777 editors. Next-Generation Sequencing in Plant Systematics. International Association for  
778 Plant Taxonomy.
- 779 Beck J.B., Semple J.C. 2015. Next-generation sampling: Pairing genomics with herbarium  
780 specimens provides species-level signal in *Solidago* (Asteraceae). Appl. Plant Sci.  
781 3:apps.1500014.
- 782 Betancur-R. R., Naylor G.J.P., Ortí G. 2014. Conserved Genes, Sampling Error, and  
783 Phylogenomic Inference. Syst. Biol. 63:257–262.

- 784 Bi K., Linderoth T., Vanderpool D., Good J.M., Nielsen R., Moritz C. 2013. Unlocking the vault:  
785 next-generation museum population genomics. *Mol. Ecol.* 22:6018–6032.
- 786 Bogdanowicz D., Giaro K., Wróbel B. 2012. TreeCmp: Comparison of trees in polynomial time.  
787 *Evol. Bioinform.* 8:475–487.
- 788 Brandley M.C., Bragg J.G., Singhal S., Chapple D.G., Jennings C.K., Lemmon A.R., Lemmon  
789 E.Moriarty, Thompson M.B., Moritz C. 2015. Evaluating the performance of anchored  
790 hybrid enrichment at the tips of the tree of life: a phylogenetic analysis of Australian  
791 *Eugongylus* group scincid lizards. *BMC Evol. Biol.* 15:1–14.
- 792 Breinholt J.W., Kawahara A.Y. 2013. Phylotranscriptomics: Saturated Third Codon Positions  
793 Radically Influence the Estimation of Trees Based on Next-Gen Data. *Genome Biol. Evol.*  
794 5:2082–2092.
- 795 Breinholt, J.W., Lemmon A.R., Lemmon E.M., Xiao L., and Kawahara A.Y. Anchored hybrid  
796 enrichment in Lepidoptera: Leveraging genomic data for studies on the megadiverse  
797 butterflies and moths. *Syst. Biol.* *Accepted*.
- 798 Brown J.M., Lemmon A.R. 2007. The importance of data partitioning and the utility of Bayes  
799 factors in Bayesian phylogenetics. *Syst. Biol.* 56:643–655.
- 800 Bryson Jr R.W., Faircloth B.C., Tsai W.L., McCormack J.E., Klicka J. 2016. Target enrichment  
801 of thousands of ultraconserved elements sheds new light on early relationships within New  
802 World sparrows (Aves: Passerellidae). *The Auk.* 133:451–458.
- 803 Burleigh J.G., Bansal M.S., Eulenstein O., Hartmann S., Wehe A., Vision T.J. 2011. Genome-  
804 Scale Phylogenetics: Inferring the Plant Tree of Life from 18,896 Gene Trees. *Syst. Biol.*  
805 60:117–125.

- 806 Castresana J. 2000. Selection of Conserved Blocks from Multiple Alignments for Their Use in  
807 Phylogenetic Analysis. *Mol. Biol. Evol.* 17:540–552.
- 808 Chase M.W., Soltis D.E., Olmstead R.G., Morgan D., Les D.H., Mishler B.D., Duvall M.R.,  
809 Price R.A., Hills H.G., Qiu Y.-L., Kron K.A., Rettig J.H., Conti E., Palmer J.D., Manhart  
810 J.R., Sytsma K.J., Michaels H.J., Kress W.J., Karol K.G., Clark W.D., Hedren M., Gaut B.S.,  
811 Jansen R.K., Kim K.-J., Wimpee C.F., Smith J.F., Furnier G.R., Strauss S.H., Xiang Q.-Y.,  
812 Plunkett G.M., Soltis P.S., Swensen S.M., Williams S.E., Gadek P.A., Quinn C.J., Eguiarte  
813 L.E., Golenberg E., Learn Jr. G.H., Graham S.W., Barrett S.C.H., Dayanandan S., Albert  
814 V.A. 1993. Phylogenetics of seed plants: an analysis of nucleotide sequences from the plastid  
815 gene *rbcL*. *Ann. Mo. Bot. Gard.* 80:528–580.
- 816 Chen F., Mackey A.J., Vermunt J.K., Roos D.S. 2007. Assessing performance of orthology  
817 detection strategies applied to eukaryotic genomes. *PloS One.* 2:e383.
- 818 Costa C.M., Roberts R.P. 2014. Techniques for improving the quality and quantity of DNA  
819 extracted from herbarium specimens. *Phytoneuron.* 48:1–8.
- 820 Crawford N.G., Faircloth B.C., McCormack J.E., Brumfield R.T., Winker K., Glenn T.C. 2012.  
821 More than 1000 ultraconserved elements provide evidence that turtles are the sister group of  
822 archosaurs. *Biol. Lett.* 8:783–786.
- 823 Crawford N.G., Parham J.F., Sellas A.B., Faircloth B.C., Glenn T.C., Papenfuss T.J., Henderson  
824 J.B., Hansen M.H., Simison W.B. 2015. A phylogenomic analysis of turtles. *Mol.*  
825 *Phylogenet. Evol.* 83:250–257.

- 826 Critchlow D.E., Pearl D.K., Qian C. 1996. The triples distance for rooted bifurcating  
827 phylogenetic trees. *Syst. Biol.* 45:323–334.
- 828 Cronn R., Knaus B.J., Liston A., Maughan P.J., Parks M., Syring J.V., Udall J. 2012. Targeted  
829 enrichment strategies for next-generation plant biology. *Am. J. Bot.* 99:291–311.
- 830 Cui L., Wall P.K., Leebens-Mack J.H., Lindsay B.G., Soltis D.E., Doyle J.J., Soltis P.S., Carlson  
831 J.E., Arumuganathan K., Barakat A. 2006. Widespread genome duplications throughout the  
832 history of flowering plants. *Genome Res.* 16:738–749.
- 833 Darriba D., Posada D. 2015. The impact of partitioning on phylogenomic accuracy. bioRxiv doi:  
834 <http://dx.doi.org/10.1101/023978>.
- 835 Darwin C., Darwin F., and Seward A.C. 1903. More letters of Charles Darwin: a record of his  
836 work in a series of hitherto unpublished letters. D. Appleton and Co., New York.
- 837 Davis C.C., Xi Z., Mathews S. 2014. Plastid phylogenomics and green plant phylogeny: almost  
838 full circle but not quite there. *BMC Biol.* 12:1–4.
- 839 De Smet R., Adams K.L., Vandepoele K., Van Montagu M.C.E., Maere S., Van de Peer Y. 2013.  
840 Convergent gene loss following gene and genome duplications creates single-copy families  
841 in flowering plants. *Proc. Natl. Acad. Sci.* 110:2898–2903.
- 842 Duarte J.M., Wall P.K., Edger P.P., Landherr L.L., Ma H., Pires J.C., Leebens-Mack J. 2010.  
843 Identification of shared single copy nuclear genes in *Arabidopsis*, *Populus*, *Vitis* and *Oryza*  
844 and their phylogenetic utility across various taxonomic levels. *BMC Evol. Biol.* 10:61.
- 845 Edwards S.V. 2009. Is a new and general theory of molecular systematics emerging? *Evolution.*  
846 63:1–19.

- 847 Edwards S.V. 2016. Phylogenomic subsampling: a brief review. *Zoologica Scripta* 45: 63-74.
- 848 Edwards S.V., Xi Z., Janke A., Faircloth B.C., McCormack J.E., Glenn T.C., Zhong B., Wu S.,  
849 Lemmon E.M., Lemmon A.R. 2016. Implementing and testing the multispecies coalescent  
850 model: a valuable paradigm for phylogenomics. *Mol. Phylogenet. Evol.* 94:447–462.
- 851 Eytan R.I., Evans B.R., Dornburg A., Lemmon A.R., Lemmon E.M., Wainwright P.C., Near T.J.  
852 2015. Are 100 enough? Inferring acanthomorph teleost phylogeny using Anchored Hybrid  
853 Enrichment. *BMC Evol. Biol.* 15:1.
- 854 Faircloth B.C., McCormack J.E., Crawford N.G., Harvey M.G., Brumfield R.T., Glenn T.C.  
855 2012. Ultraconserved elements anchor thousands of genetic markers spanning multiple  
856 evolutionary timescales. *Syst. Biol.* 61:717–726.
- 857 Frandsen P.B., Calcott B., Mayer C., Lanfear R. 2015. Automatic selection of partitioning  
858 schemes for phylogenetic analyses using iterative k-means clustering of site rates. *BMC*  
859 *Evol. Biol.* 15:1–17.
- 860 Freeman J.L., Tamaoki M., Stushnoff C., Quinn C.F., Cappa J.J., Devonshire J., Fakra S.C.,  
861 Marcus M.A., McGrath S.P., Van Hoewyk D., Pilon-Smits E.A.H. 2010. Molecular  
862 mechanisms of selenium tolerance and hyperaccumulation in *Stanleya pinnata*. *Plant Physiol.*  
863 153:1630–1652.
- 864 Glasauer S.M., Neuhauss S.C. 2014. Whole-genome duplication in teleost fishes and its  
865 evolutionary consequences. *Mol. Genet. Genomics.* 289:1045–1060.

- 866 Griffin P., Robin C., Hoffmann A. 2011. A next-generation sequencing method for overcoming  
867 the multiple gene copy problem in polyploid phylogenetics, applied to *Poa* grasses. BMC  
868 Biol. 9:1–19.
- 869 Grover C.E., Gallagher J.P., Jareczek J.J., Page J.T., Udall J.A., Gore M.A., Wendel J.F. 2015.  
870 Re-evaluating the phylogeny of allopolyploid *Gossypium* L. Molecular Phylogenetics and  
871 Evolution. 92:45–52.
- 872 Hamilton C.A., Lemmon A.R., Lemmon E. Moriarty, Bond J.E. 2016. Expanding anchored  
873 hybrid enrichment to resolve both deep and shallow relationships within the spider tree of  
874 life. BMC Evolutionary Biology 16:212.
- 875 Heyduk K., Trapnell D.W., Barrett C.F., Leebens-Mack J. 2016. Phylogenomic analyses of  
876 species relationships in the genus *Sabal* (Arecaceae) using targeted sequence capture. Biol. J.  
877 Linn. Soc. 117:106–120.
- 878 Hillis D.M., Huelsenbeck J.P., Cunningham C.W. 1994. Application and accuracy of molecular  
879 phylogenies. Science 264:671–677.
- 880 Hoff M., Orf S., Riehm B., Darriba D., Stamatakis A. 2016. Does the choice of nucleotide  
881 substitution models matter topologically? BMC Bioinformatics 17:1–13.
- 882 Hosner P.A., Faircloth B.C., Glenn T.C., Braun E.L., Kimball R.T. 2015. Avoiding missing data  
883 biases in phylogenomic inference: an empirical study in the landfowl (Aves: Galliformes).  
884 Mol. Biol. Evol. 33:1110–1125.
- 885 Jiao Y., Wickett N.J., Ayyampalayam S., Chanderbali A.S., Landherr L., Ralph P.E., Tomsho  
886 L.P., Hu Y., Liang H., Soltis P.S., Soltis D.E., Clifton S.W., Schlarbaum S.E., Schuster S.C.,

- 887 Ma H., Leebens-Mack J., dePamphilis C.W. 2011. Ancestral polyploidy in seed plants and  
888 angiosperms. *Nature*. 473:97–100.
- 889 Katoh K., Standley D.M. 2013. MAFFT multiple sequence alignment software version 7:  
890 improvements in performance and usability. *Mol. Biol. Evol.* 30:772–780.
- 891 Kearse M., Moir R., Wilson A., Stones-Havas S., Cheung M., Sturrock S., Buxton S., Cooper A.,  
892 Markowitz S., Duran C. 2012. Geneious Basic: an integrated and extendable desktop  
893 software platform for the organization and analysis of sequence data. *Bioinformatics*.  
894 28:1647–1649.
- 895 Kluge A.G. 1989. A concern for evidence and a phylogenetic hypothesis of relationships among  
896 *Epicrates* (Boidae, Serpentes). *Syst. Biol.* 38:7–25.
- 897 Lanfear R., Calcott B., Ho S.Y., Guindon S. 2012. PartitionFinder: combined selection of  
898 partitioning schemes and substitution models for phylogenetic analyses. *Mol. Biol. Evol.*  
899 29:1695–1701.
- 900 Leaché A.D., Rannala B. 2011. The accuracy of species tree estimation under simulation: a  
901 comparison of methods. *Syst. Biol.* 60:126–137.
- 902 Lee E.K., Cibrian-Jaramillo A., Kolokotronis S.-O., Katari M.S., Stamatakis A., Ott M., Chiu  
903 J.C., Little D.P., Stevenson D.W., McCombie W.R. 2011a. A functional phylogenomic view  
904 of the seed plants. *PLoS Genet.* 7:e1002411.
- 905 Lemmon A.R., Brown, J.M., Stanger-Hall, K., Lemmon, E. Moriarty. 2009. The effect of  
906 ambiguous data on phylogenetic estimates obtained by maximum likelihood and Bayesian  
907 inference. *Syst. Biol.* 58:130–145.



- 908 Lemmon A.R., Emme S.A., Lemmon E. Moriarty 2012. Anchored Hybrid Enrichment for  
909 Massively High-Throughput Phylogenomics. *Syst. Biol.* 61:727–744.
- 910 Lemmon A.R., Moriarty E.C. 2004. The importance of proper model assumption in Bayesian  
911 phylogenetics. *Syst. Biol.* 53:265–277.
- 912 Lemmon E.M., Lemmon A.R. 2013. High-Throughput Genomic Data in Systematics and  
913 Phylogenetics. *Annu. Rev. Ecol. Evol. Syst.* 44:99–121.
- 914 Lemon J. 2006. Plotrix: a package in the red light district of R. *R-News.* 6:8–12.
- 915 L veill -Bourret E., Starr J.R., Ford B.A., Lemmon E.M., Lemmon A.R. *In review.* Anchored  
916 phylogenomics for angiosperms II: Resolving rapid generic and tribal-level radiations. *Syst.*  
917 *Biol.*
- 918 Li C., Ort  G., Zhang G., Lu G. 2007. A practical approach to phylogenomics: the phylogeny of  
919 ray-finned fish (Actinopterygii) as a case study. *BMC Evol. Biol.* 7:44–44.
- 920 Magall n S., Hilu K.W., Quandt D. 2013. Land plant evolutionary timeline: Gene effects are  
921 secondary to fossil constraints in relaxed clock estimation of age and substitution rates. *Am.*  
922 *J. Bot.* 100: 556–573.
- 923 Mamanova L., Coffey A.J., Scott C.E., Kozarewa I., Turner E.H., Kumar A., Howard E.,  
924 Shendure J., Turner D.J. 2010. Target-enrichment strategies for next-generation sequencing.  
925 *Nat. Methods.* 7:111–118.
- 926 Mandel J.R., Dikow R.B., Funk V.A., Masalia R.R., Staton S.E., Kozik A., Michelmore R.W.,  
927 Rieseberg L.H., Burke J.M. 2014. A Target Enrichment Method for Gathering Phylogenetic

- 928 Information from Hundreds of Loci: An Example from the Compositae. *Appl. Plant Sci.*  
929 2:1300085.
- 930 McCormack J.E., Faircloth B.C., Crawford N.G., Gowaty P.A., Brumfield R.T., Glenn T.C.  
931 2012. Ultraconserved elements are novel phylogenomic markers that resolve placental  
932 mammal phylogeny when combined with species-tree analysis. *Genome Res.* 22:746–754.
- 933 Meiklejohn K.A., Faircloth B.C., Glenn T.C., Kimball R.T., Braun E.L. 2016. Analysis of a  
934 Rapid Evolutionary Radiation Using Ultraconserved Elements: Evidence for a Bias in Some  
935 Multispecies Coalescent Methods. *Syst. Biol.* 65:612-627.
- 936 Meredith R.W., Janecka J.E., Gatesy J., Ryder O.A., Fisher C.A., Teeling E.C., Goodbla A.,  
937 Eizirik E., Simao T.L.L., Stadler T., Rabosky D.L., Honeycutt R.L., Flynn J.J., Ingram C.M.,  
938 Steiner C., Williams T.L., Robinson T.J., Burk-Herrick A., Westerman M., Ayoub N.A.,  
939 Springer M.S., Murphy W.J. 2011. Impacts of the Cretaceous terrestrial revolution and KPg  
940 extinction on mammal diversification. *Science* 334:521–524.
- 941 Meyer M., Kircher M. 2010. Illumina sequencing library preparation for highly multiplexed  
942 target capture and sequencing. *Cold Spring Harb. Protoc.* 2010; doi:10.1101/pdb.prot5448.
- 943 Mirarab S., Warnow T. 2015. ASTRAL-II: coalescent-based species tree estimation with many  
944 hundreds of taxa and thousands of genes. *Bioinformatics.* 31:i44–i52.
- 945 Moore M.J., Bell C.D., Soltis P.S., Soltis D.E. 2007. Using plastid genome-scale data to resolve  
946 enigmatic relationships among basal angiosperms. *Proc. Natl. Acad. Sci.* 104:19363–19368.

- 947 Morales H.E., Pavlova A., Sunnucks P., Major R., Amos N., Joseph L., Lemmon A.R., Endler  
948 J.A., Delhey K. Neutral and selective drivers of colour evolution in a widespread Australian  
949 passerine. *J. Biogeogr.*; <http://hdl.handle.net/11858/00-001M-0000-002B-11FF-D> *In review*
- 950 Morrison D. 2011. *Introduction to Phylogenetic Networks*. RJR Publications. Uppsala, Sweden.
- 951 Paradis E., Claude J., Strimmer K. 2004. APE: analyses of phylogenetics and evolution in R  
952 language. *Bioinformatics*. 20:289–290.
- 953 Parks M., Cronn R., Liston A. 2012. Separating the wheat from the chaff: mitigating the effects  
954 of noise in a plastome phylogenomic data set from *Pinus* L. (Pinaceae). *BMC Evol. Biol.*  
955 12:1–17.
- 956 Peloso P.L.V., Frost D.R., Richards S.J., Rodrigues M.T., Donnellan S., Matsui M., Raxworthy  
957 C.J., Biju S.D., Lemmon E.M., Lemmon A.R., Wheeler W.C. 2016. The impact of anchored  
958 phylogenomics and taxon sampling on phylogenetic inference in narrow-mouthed frogs  
959 (Anura, Microhylidae). *Cladistics* 32:113–140.
- 960 Pimm S.L., Joppa L.N. 2015. How many plant species are there, where are they, and at what rate  
961 are they going extinct? *Ann. Mo. Bot. Gard.* 100:170–176.
- 962 Posada D., Crandall K.A. 1998. Modeltest: testing the model of DNA substitution.  
963 *Bioinformatics* 14:817–818.
- 964 Prum R.O., Berv J.S., Dornburg A., Field D.J., Townsend J.P., Lemmon E.M., Lemmon A.R.  
965 2015. A comprehensive phylogeny of birds (Aves) using targeted next-generation DNA  
966 sequencing. *Nature*. 526:569–573.

- 967 Pyron R.A., Hendry C.R., Chou V.M., Lemmon E.M., Lemmon A.R., Burbrink F.T. 2014.  
968 Effectiveness of phylogenomic data and coalescent species-tree methods for resolving  
969 difficult nodes in the phylogeny of advanced snakes (Serpentes: Caenophidia). *Mol.*  
970 *Phylogenet. Evol.* 81:221–231.
- 971 de Queiroz A., Gatesy J. 2007. The supermatrix approach to systematics. *Trends Ecol. Evol.*  
972 22:34–41.
- 973 Reneker J., Lyons E., Conant G.C., Pires J.C., Freeling M., Shyu C.-R., Korkin D. 2012. Long  
974 identical multispecies elements in plant and animal genomes. *Proc. Natl. Acad. Sci.*  
975 109:E1183–E1191.
- 976 Ripplinger J., Sullivan J. 2008. Does choice in model selection affect maximum likelihood  
977 analysis? *Syst. Biol.* 57:76–85.
- 978 Rokyta D.R., Lemmon A.R., Margres M.J., Aronow K. 2012. The venom-gland transcriptome of  
979 the eastern diamondback rattlesnake (*Crotalus adamanteus*). *BMC Genomics.* 13:312.
- 980 Roure B., Baurain D., Philippe H. 2013. Impact of missing data on phylogenies inferred from  
981 empirical phylogenomic data sets. *Mol. Biol. Evol.* 30:197–214.
- 982 Ruane S., Raxworthy C.J., Lemmon A.R., Lemmon E.M., Burbrink F.T. 2015. Comparing  
983 species tree estimation with large anchored phylogenomic and small Sanger-sequenced  
984 molecular datasets: an empirical study on Malagasy pseudoxyrhopiine snakes. *BMC Evol.*  
985 *Biol.* 15:1.

- 986 Ruhfel B.R., Gitzendanner M.A., Soltis P.S., Soltis D.E., Burleigh J.G. 2014. From algae to  
987 angiosperms-inferring the phylogeny of green plants (Viridiplantae) from 360 plastid  
988 genomes. *BMC Evol. Biol.* 14:23.
- 989 Sass C., Iles W.J.D., Barrett C.F., Smith S.Y., Specht C.D. 2016. Revisiting the Zingiberales:  
990 using multiplexed exon capture to resolve ancient and recent phylogenetic splits in a  
991 charismatic plant lineage. *Peerj.* 4:e1584.
- 992 Schmickl R., Liston A., Zeisek V., Oberlander K., Weitemier K., Straub S.C., Cronn R.C.,  
993 Dreyer L.L., Suda J. 2016. Phylogenetic marker development for target enrichment from  
994 transcriptome and genome skim data: the pipeline and its application in southern African  
995 *Oxalis* (Oxalidaceae). *Mol. Ecol. Resour.* 16:1124-1135.
- 996 Shimodaira H., Hasegawa M. 2001. CONSEL: for assessing the confidence of phylogenetic tree  
997 selection. *Bioinformatics.* 17:1246–1247.
- 998 Shimodaira, H. 2002. An approximately unbiased test of phylogenetic tree selection. *Syst. Biol.*  
999 51: 492-508.
- 1000 Simmons, M. P., J. Gatesy. 2015. Coalescence vs. concatenation: sophisticated analyses vs. first  
1001 principles applied to rooting the angiosperms. *Mol. Phylogenet. Evol.* 91: 98-122.
- 1002 Simmons, M. P., J. Gatesy. 2016. Biases of tree-independent-character-subsampling methods.  
1003 *Mol. Phylogenet. Evol.* 100: 424-443.
- 1004 Simmons M.P., Sloan D.B., Gatesy J. 2016. The effects of subsampling gene trees on coalescent  
1005 methods applied to ancient divergences. *Mol. Phylogenet. Evol.* 97:76–89.

- 1006 Song S., Liu L., Edwards S.V., Wu S., 2012. Resolving conflict in eutherian mammal phylogeny  
1007 using phylogenomics and the multispecies coalescent model. Proc. Natl. Acad. Sci. USA  
1008 109:14942–14947.
- 1009 Springer M. S., J. Gatesy. 2016. The gene tree delusion. Mol. Phylogenet. Evol. 94:1-33.
- 1010 Soltis D.E., Smith S.A., Cellinese N., Wurdack K.J., Tank D.C., Brockington S.F., Refulio-  
1011 Rodriguez N.F., Walker J.B., Moore M.J., Carlswald B.S. 2011. Angiosperm phylogeny: 17  
1012 genes, 640 taxa. Am. J. Bot. 98:704–730.
- 1013 de Sousa F., Bertand Y.J.K., Nylinder S., Oxelman B., Eriksson J.S., Pfeil B.E. 2014.  
1014 Phylogenetic properties of 50 nuclear loci in *Medicago* (Leguminosae) generated using  
1015 multiplexed sequence capture and next-generation sequencing. PLoS ONE 9:e109704. doi:  
1016 10.1371/journal.pone.0109704.
- 1017 Stamatakis A. 2014. RAxML version 8: a tool for phylogenetic analysis and post-analysis of  
1018 large phylogenies. Bioinformatics. 30:1312–1313.
- 1019 Stephens J.D., Rogers W.L., Heyduk K., Cruse-Sanders J.M., Determann R.O., Glenn T.C.,  
1020 Malmberg R.L. 2015a. Resolving phylogenetic relationships of the recently radiated  
1021 carnivorous plant genus *Sarracenia* using target enrichment. Mol. Phylogenet. Evol. 85:76–  
1022 87.
- 1023 Stephens J.D., Rogers W.L., Mason C.M., Donovan L.A., Malmberg R.L. 2015b. Species tree  
1024 estimation of diploid *Helianthus* (Asteraceae) using target enrichment. Am. J. Bot. 102:910–  
1025 920.

- 1026 Stout, C.C., Tan M., Lemmon A.R., Lemmon E.M., Armbruster J.W. Resolving Cypriniformes  
1027 Relationships Using An Anchored Enrichment Approach. *BMC Evol. Biol. In Review*.
- 1028 Stull G.W., Moore M.J., Mandala V.S., Douglas N.A., Kates H.-R., Qi X., Brockington S.F.,  
1029 Soltis P.S., Soltis D.E., Gitzendanner M.A. 2013. A targeted enrichment strategy for  
1030 massively parallel sequencing of angiosperm plastid genomes. *Appl. Plant Sci.* 1:1200497.
- 1031 Sun Y., Moore M.J., Zhang S., Soltis P.S., Soltis D.E., Zhao T., Meng A., Li X., Li J., Wang H.  
1032 2016. Phylogenomic and structural analyses of 18 complete plastomes across nearly all  
1033 families of early-diverging eudicots, including an angiosperm-wide analysis of IR gene  
1034 content evolution. *Mol. Phylogenet. Evol.* 96:93–101.
- 1035 Syring J., Cronn R., Tennessen J.A., Jennings T.N., Scelfo-Dalbey C., Wegrzyn J. 2016.  
1036 Targeted capture sequencing in whitebark pine reveals range-wide demographic and adaptive  
1037 patterns despite challenges of a large, repetitive genome. *Frontiers in Plant Science.* 7:484.
- 1038 Talavera G., Castresana J. 2007. Improvement of phylogenies after removing divergent and  
1039 ambiguously aligned blocks from protein sequence alignments. *Syst. Biol.* 56:564–577.
- 1040 Berardini T.Z., Reiser L, Li D., Mezheritsky Y., Muller R., Strait E., Huala E. 2015. The  
1041 *Arabidopsis* Information Resource: Making and mining the "gold standard" annotated  
1042 reference plant genome. *Genesis.* 53:474-485.
- 1043 Terry N., Zayed A.M., de Souza M.P., Tarun A.S. 2000. Selenium in higher plants. *Ann. Rev.*  
1044 *Plant Physiol. Plant Mol. Biol.* 51:401–432.
- 1045 Townsend, T.M., Mulcahy, D.G., Noonan, B.P., Sites, J.W., Kuczynski, C.A., Wiens, J.J.,  
1046 Reeder, T.W., 2011. Phylogeny of iguanian lizards inferred from 29 nuclear loci, and a

- 1047 comparison of concatenated and species-tree approaches for an ancient, rapid radiation. *Mol.*  
1048 *Phylogenet. Evol.* 61:363–380.
- 1049 Tucker D.B., Colli G.R., Giugliano L.G., Hedges S.B., Hendry C.R., Lemmon E. Moriarty,  
1050 Lemmon A.R., Pyron R.A. 2016. Methodological congruence in phylogenomic analyses with  
1051 morphological support for teiid lizards (Sauria: Teiidae). *Mol. Phylogenet. Evol.* 103:75–84.
- 1052 Weitemier K., Straub S.C., Cronn R.C., Fishbein M., Schmickl R., McDonnell A., Liston A.  
1053 2014. Hyb-Seq: Combining target enrichment and genome skimming for plant  
1054 phylogenomics. *Appl. Plant Sci.* 2:1400042.
- 1055 Wicke S., Schneeweiss G.M. 2015. Next-generation organellar genomics: Potentials and pitfalls  
1056 of high-throughput technologies for molecular evolutionary studies and plant systematics. In:  
1057 Horandl E., Appelhans M.S., editors. *Next Generation Sequencing in Plant Systematics.*  
1058 Koenigstein: A R G Gantner Verlag K G. Pp. 9–50.
- 1059 Wickett N.J., Mirarab S., Nguyen N., Warnow T., Carpenter E., Matasci N., Ayyampalayam S.,  
1060 Barker M.S., Burleigh J.G., Gitzendanner M.A., Ruhfel B.R., Wafula E., Der J.P., Graham  
1061 S.W., Mathews S., Melkonian M., Soltis D.E., Soltis P.S., Miles N.W., Rothfels C.J.,  
1062 Pokorny L., Shaw A.J., DeGironimo L., Stevenson D.W., Surek B., Villarreal J.C., Roure B.,  
1063 Philippe H., dePamphilis C.W., Chen T., Deyholos M.K., Baucom R.S., Kutchan T.M.,  
1064 Augustin M.M., Wang J., Zhang Y., Tian Z., Yan Z., Wu X., Sun X., Wong G.K.-S.,  
1065 Leebens-Mack J. 2014. Phylotranscriptomic analysis of the origin and early diversification of  
1066 land plants. *Proc. Natl. Acad. Sci.* 111:E4859–E4868.
- 1067 Xia X., Lemey P. 2009. Assessing substitution saturation with DAMBE. In: Lemey P., Salemi  
1068 M., and Vandamme A.-M., editors. *The Phylogenetic Handbook: a Practical Approach to*



- 1069 Phylogenetic Analysis and Hypothesis Testing. Cambridge University Press, UK. Pp. 611–  
1070 626.
- 1071 Yang Z. 1994. Maximum likelihood phylogenetic estimation from DNA sequences with variable  
1072 rates over sites: approximate methods. *J. Mol. Evol.* 39:306–314.
- 1073 Young A.D., Lemmon A.R., Skevington J.H., Mengual X., Ståhls G., Reemer M., Jordaens K.,  
1074 Kelso S., Lemmon E. Moriarty, Hauser M. 2016. Anchored enrichment dataset for true flies  
1075 (order Diptera) reveals insights into the phylogeny of flower flies (family Syrphidae). *BMC*  
1076 *Evol. Biol.* 16:143.
- 1077 Zeng L., Zhang Q., Sun R., Kong H., Zhang N., Ma H. 2014. Resolution of deep angiosperm  
1078 phylogeny using conserved nuclear genes and estimates of early divergence times. *Nat*  
1079 *Commun.* 5:4956.
- 1080 Zimmer E.A., Wen J. 2012. Using nuclear gene data for plant phylogenetics: Progress and  
1081 prospects. *Mol. Phylogenet. Evol.* 65:774–785.
- 1082 Zwickl D.J., Hillis D.M. 2002. Increased taxon sampling greatly reduces phylogenetic error.  
1083 *Syst. Biol.* 51:588–598.
- 1084

1085 **FIGURE CAPTIONS**

1086 **Figure 1.** Pipeline for locus selection and probe design. Candidate loci were derived from Duarte et al.  
1087 (2010) and filtered to produce anchor loci that each contained one low-copy exon with sufficient degree  
1088 of conservation across angiosperms. Eighteen functional targets involved in selenium tolerance were  
1089 added prior to probe tiling. Scripts used in probe design are available in Dryad (accession XXXX).

1090 **Figure 2.** Standard pipeline for processing anchored phylogenomic data to produce final alignments.  
1091 Merged read pairs are assembled using a quasi-de novo approach that utilizes divergent references from  
1092 the kit. After orthologous sets of consensus sequences are identified, raw alignments are constructed using  
1093 MAFFT and trimmed/masked to remove probable misaligned regions. Alignments are finalized after  
1094 being manually inspected and trimmed in Geneious. Scripts are available in Dryad (accession XXXX).

1095 **Figure 3.** Pipeline for generating heat maps representing robustness of phylogenetic estimates to variation  
1096 in site and locus filtering. Labeled arrows involve steps performed using standard methods, whereas  
1097 unlabeled arrows involve steps performed using custom scripts available in Dryad (accession XXXX).

1098 **Figure 4.** Strategy for generating 196 data filtering conditions to assess robustness of phylogenetic  
1099 estimates. (a) Sites are ranked by rate as estimated using kmeans in PartitionFinder. Invariable sites are  
1100 plotted to right of the distribution. Fourteen site-inclusion thresholds (gray lines/arrows on histogram) are  
1101 applied, with the most variable sites being excluded at the lowest thresholds. Gene trees constructed after  
1102 applying each of these thresholds are compared pairwise using the triplet measure in TreeComp to  
1103 produce a pairwise tree-distance matrix. (b) Plotting loci in multidimensional space (MDS) using  
1104 corresponding tree-distances allows for the identification of outliers (furthest from center) and 14  
1105 thresholds for inclusion of loci for phylogeny estimation (gray circles). (c) Example of heat-map for one  
1106 node showing phylogenetic support as color for each of the  $14 \times 14 = 196$  combinations/data sets, with  
1107 white indicating no support for the node and black indicating 100% support for the node. (d) Thresholds

1108 (gray lines/arrows) plotted on the distribution of loci ranked by distance from origin on the MDS plot.

1109 Robust estimates show relatively consistent level of support (similar color) across the heat map in (c).

1110 **Figure 5.** The relationship between locus recovery and taxonomic representation in the enrichment kit.

1111 For each enriched sample, the number of loci recovered with consensus sequence greater than 250 bp is

1112 plotted against the divergence time (in millions of years - see Supplemental Methods for details) between

1113 that sample and the nearest reference species used for probe design. The curve represents the best-fit

1114 quadratic polynomial ( $y = -0.0083x^2 + 0.3049x + 501.43$ ;  $R^2 = 0.35734$ ).

1115 **Figure 6.** Estimates of the angiosperm phylogeny under a coalescent (ASTRAL) or supermatrix

1116 (concatenated RAxML) framework with all data included. Heat-maps on each internal node indicate

1117 bootstrap support across 196 data inclusion conditions (example shown in upper right), with lower-left

1118 corner of each heat map indicating support when all data are included (colors described in Fig. 4). Solid

1119 black heat maps indicate high support for a node under a broad range of conditions. Heat maps for nodes

1120 not present in both topologies are outlined in red.

1121 **Figure 7** Using heat maps to compare robustness of support for key nodes across analysis frameworks.

1122 (a) Support for three alternative relationships among eudicots, monocots, and magnoliids under coalescent

1123 and supermatrix frameworks. Under the coalescent framework, a eudicot-monocot sister relationship is

1124 supported across a broad range of conditions (>63% of sites are included). Under the supermatrix

1125 approach, however, support shifts from strong support for a eudicot-magnoliid sister relationship when all

1126 sites are included to strong support for a eudicot-monocot sister relationship when 54%-76% of sites are

1127 included. (b) An additional approach for visualizing support for alternative hypotheses. In this

1128 representation, support for each of the three alternatives is indicated by a different color in the rgb (red-

1129 green-blue) color space, with the opacity of the color indicating the sum of support across the three

1130 alternatives (white indicates no support for any hypothesis). (c) A triangle representing rgb space can also

1131 be used to indicate support for alternative hypotheses. In this representation, each vertex of the triangle

1132 corresponds to 100% support for one of the three alternative hypotheses (colors have same meaning as in  
1133 [b]). For each one of the data sampling schemes (pixel in [b]) a yellow point is plotted on the triangle, at  
1134 the location corresponding to the relative support for the three hypotheses (a point in the middle would  
1135 indicate 33% support for each of the three alternative hypotheses, whereas a point half-way along one of  
1136 the edges of the triangle would indicate 50% support for each of two alternatives).

1137

1138

1139

1140

1141  
1142  
1143

**Figure 1.**

## Probe Design Workflow

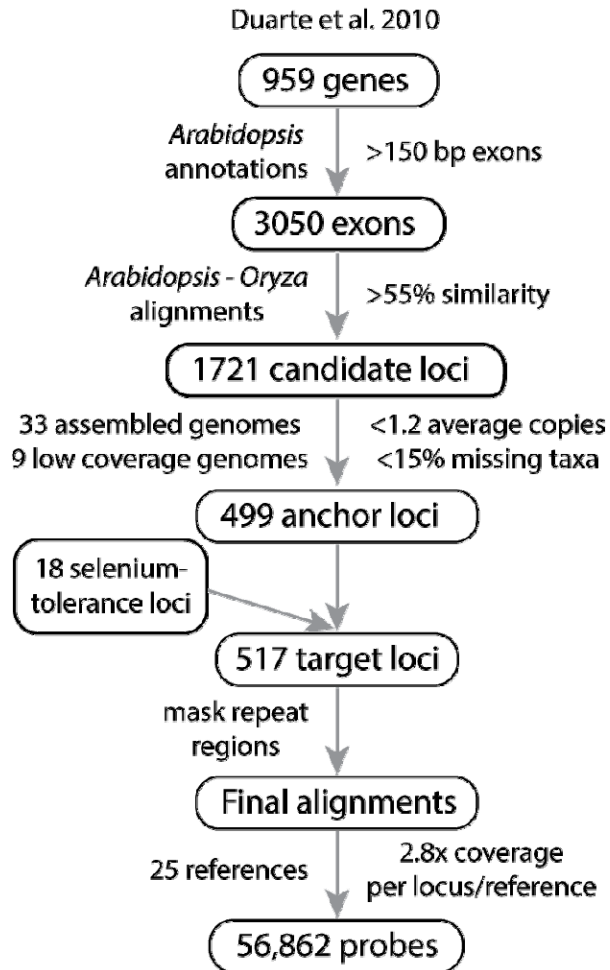

1144

1145 **Figure 2.**

## Analysis Pipeline

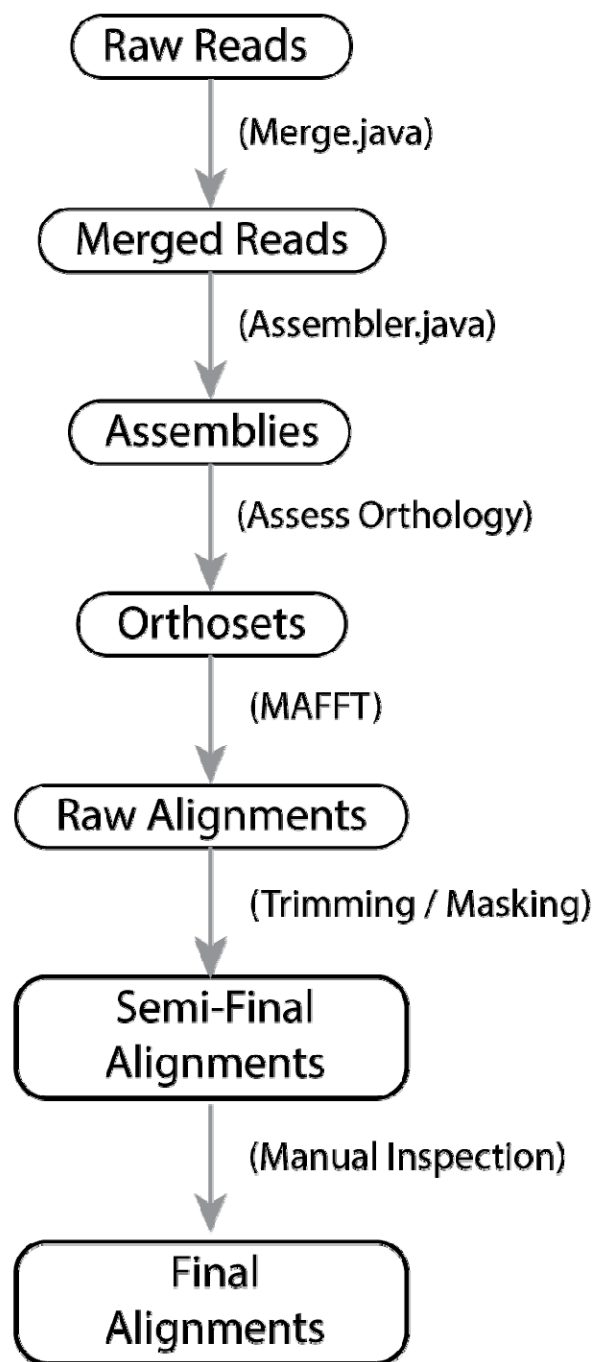

1146

1147

1148 **Figure 3.**

## Heat Map Pipeline

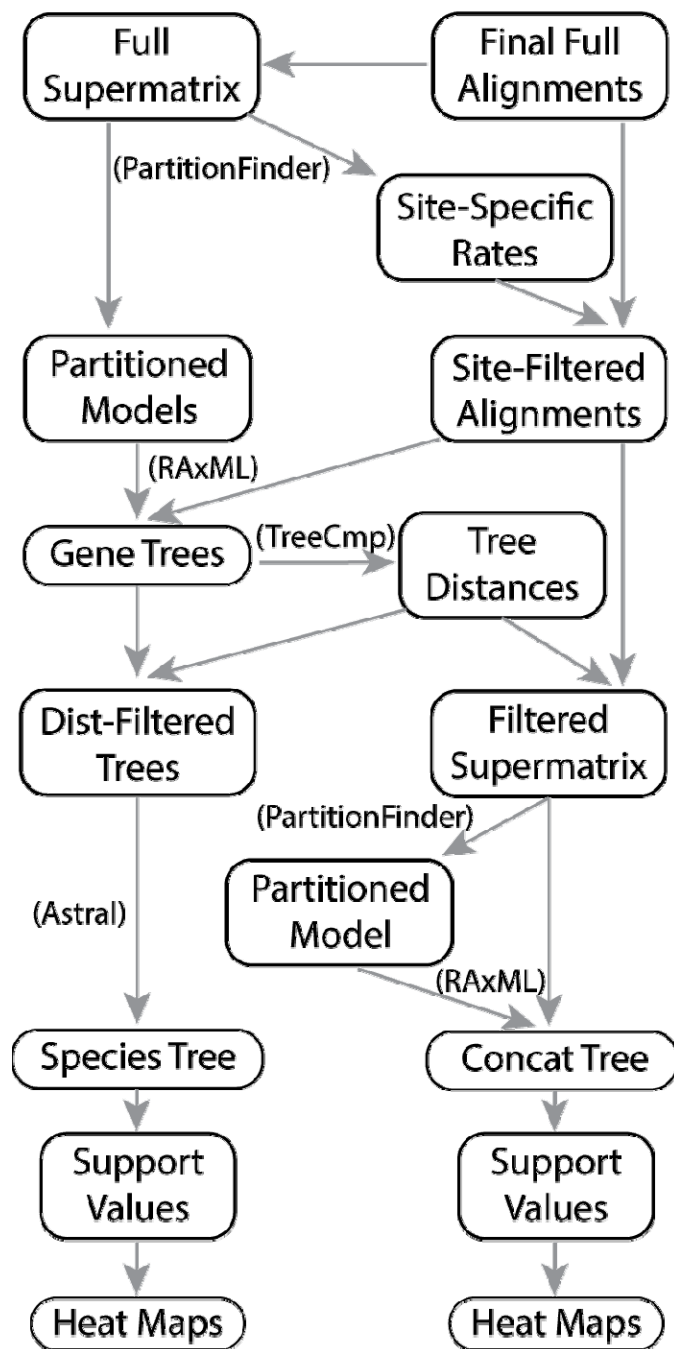

1149

1150

1151

1152 **Figure 4.**

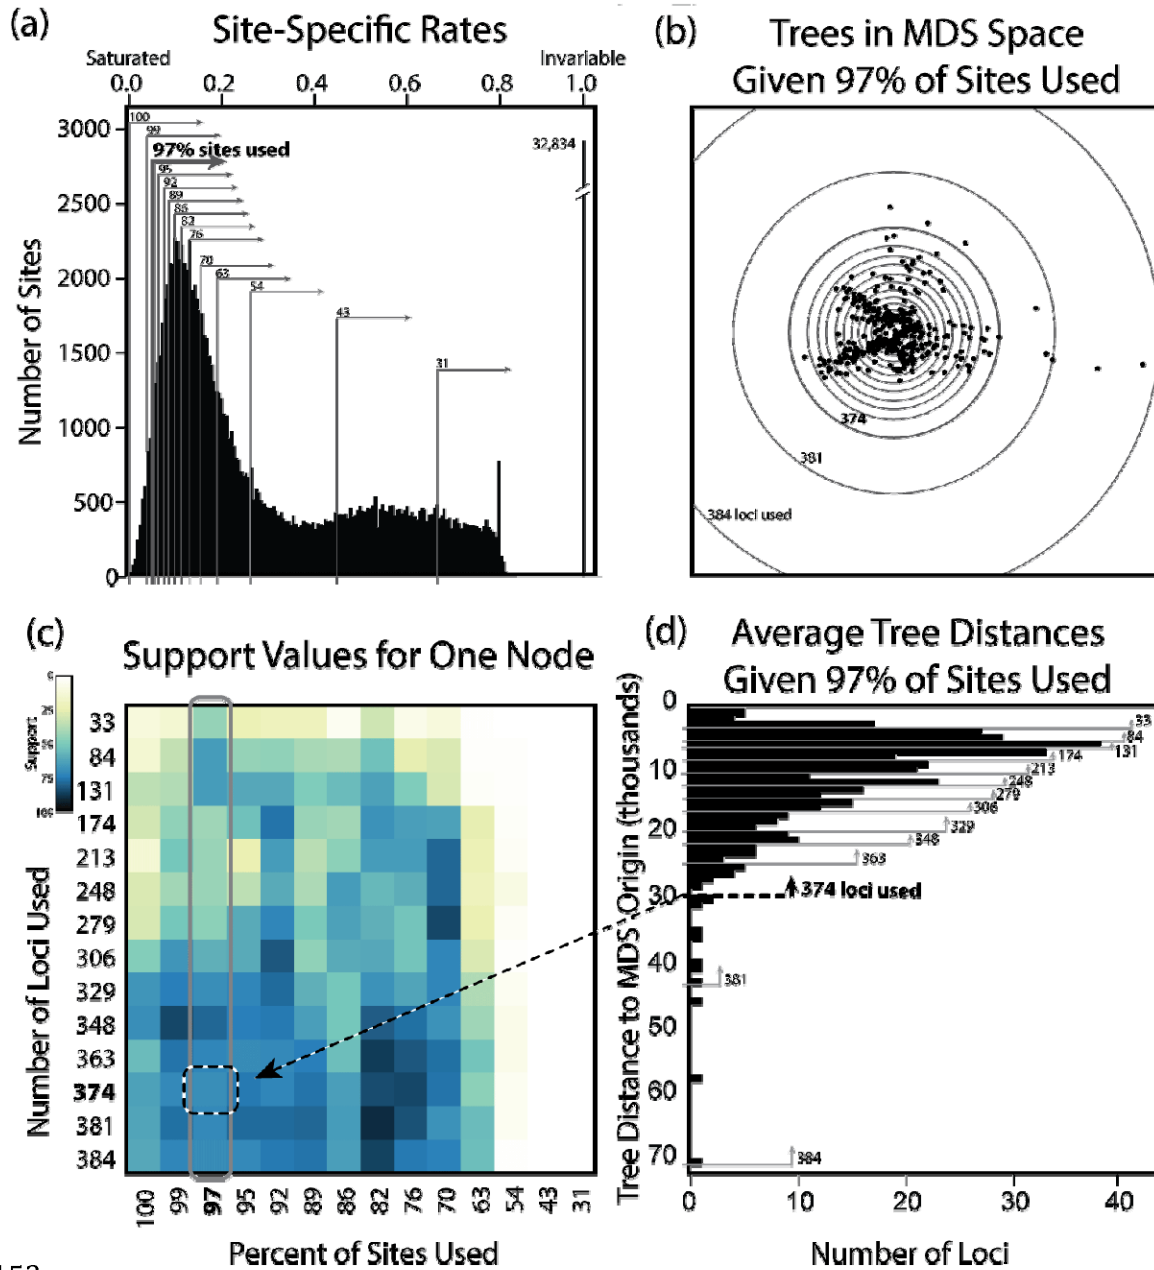

1153

1154

1155

1156



1157 **Figure 5.**

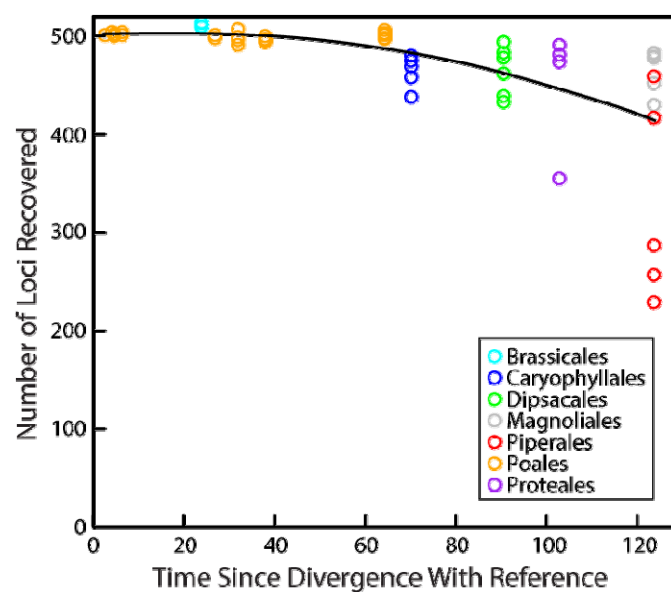

1158

1159

1160

1161

1162

1163

1164

1165

1166

1167

1168

1169

1170 **Figure 6.**

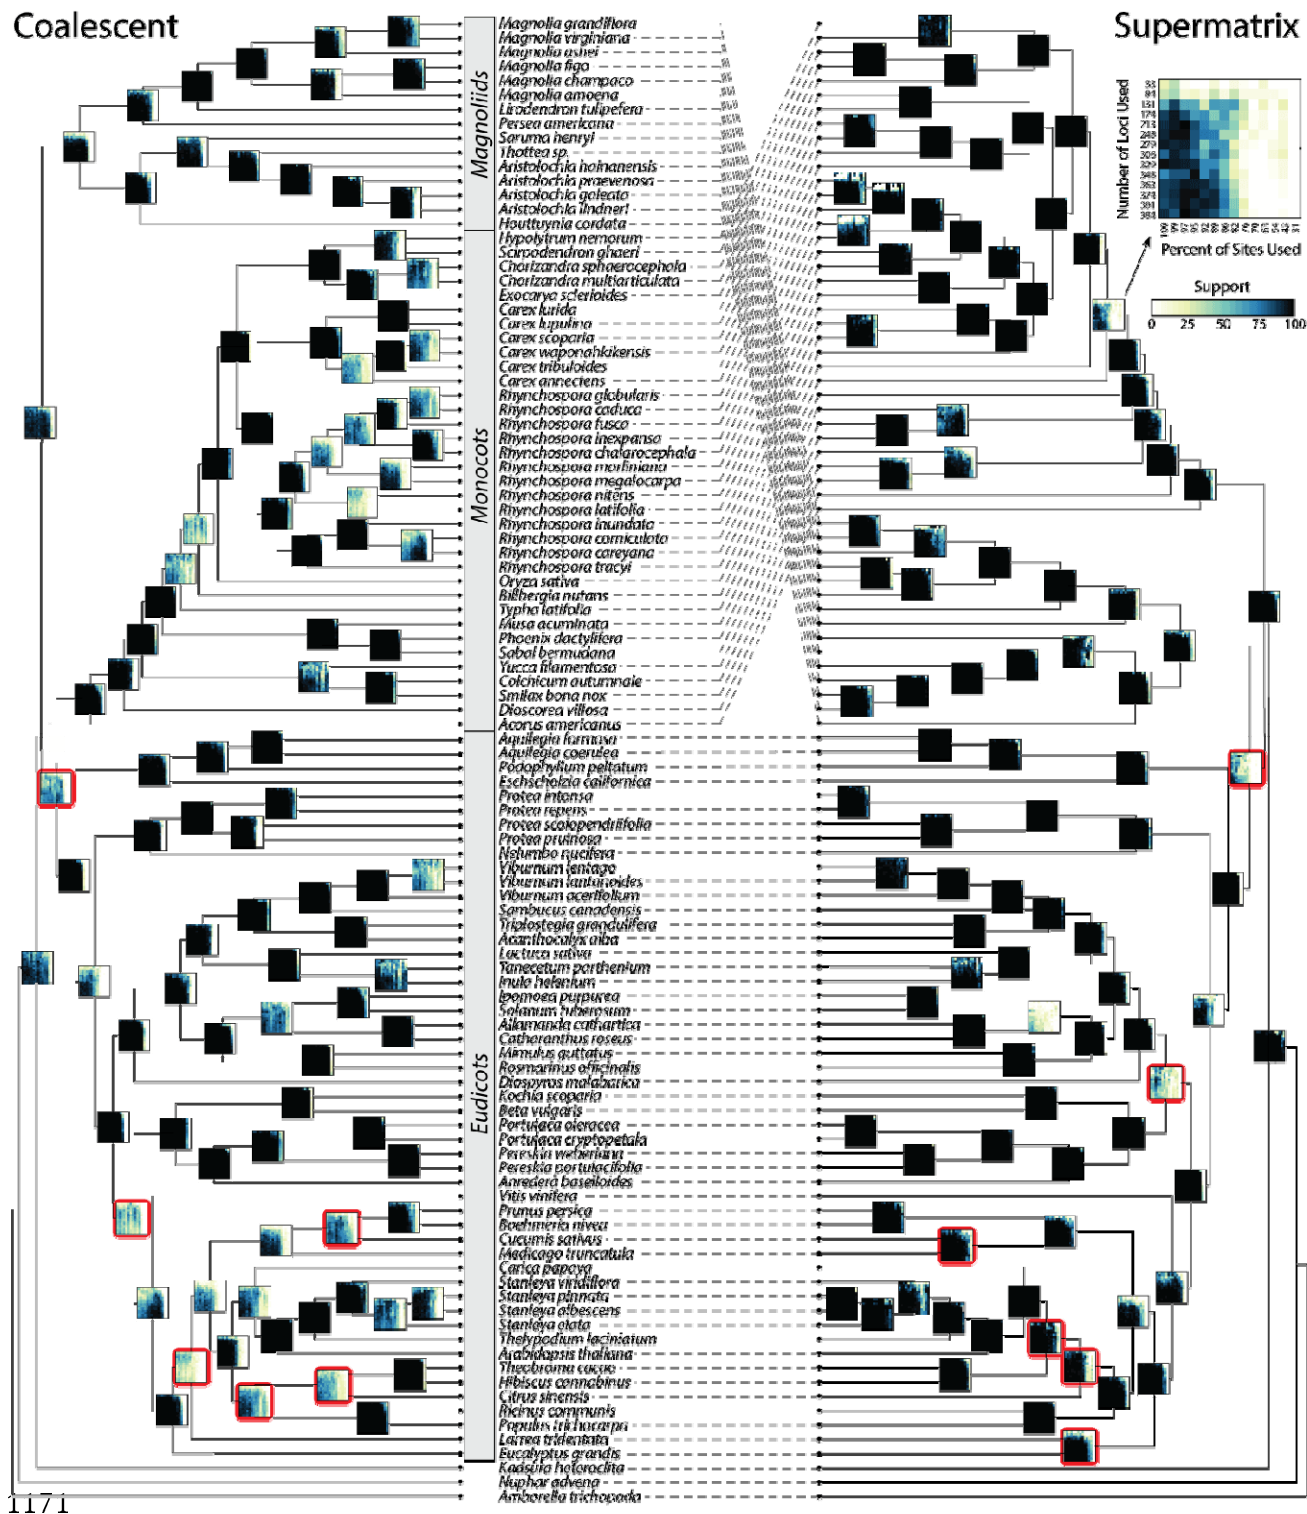

1173 **Figure 7.**

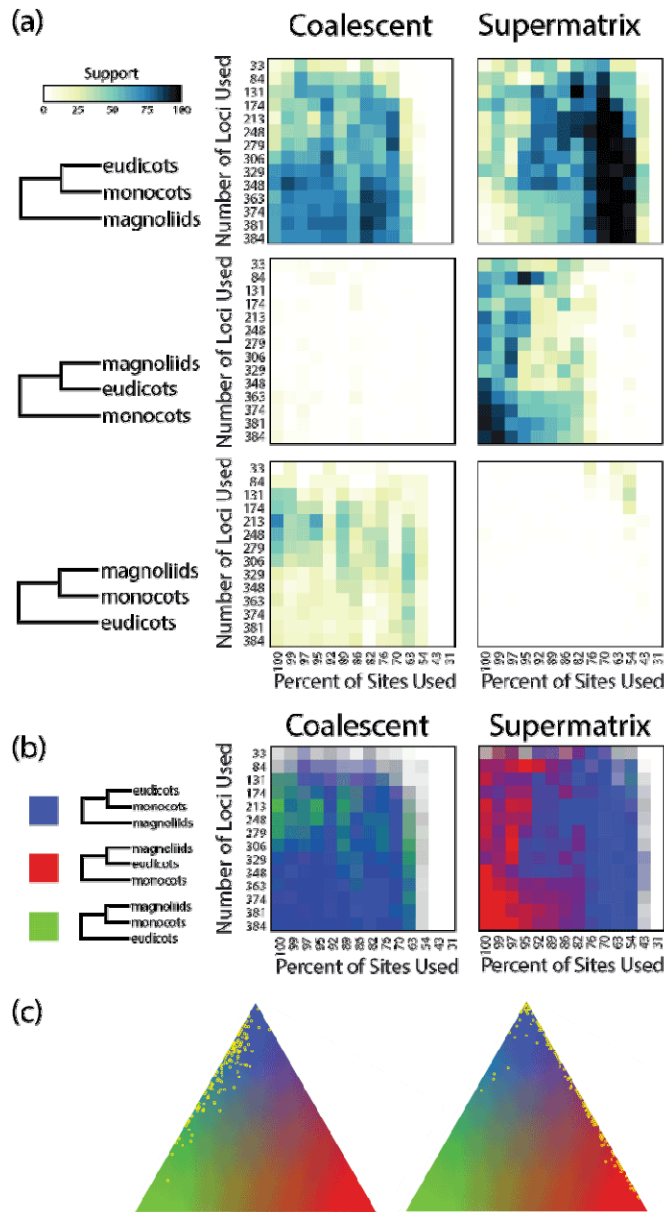

1174

1175 **Table 1.** Recent phylogenetic or population genetic studies that used hybrid-enrichment methods, including plastid-oriented studies.  
 1176 Studies targeting only nuclear regions but that utilized plastid sequences found in bycatch are denoted by an asterisk (\*). # Ref. Taxa  
 1177 refers to the number of reference taxa included in a probe design. # Sp. Copy Assessment indicates how many species the study  
 1178 included in their assessment of copy number for each locus included in the probe kit developed.

| Study                   | Basal Group        | Major Group       | Family         | Genus                   | # Ref. Taxa | # Nuclear Loci Targeted | Probes Target Plastids | # Sp. Copy Assessment |
|-------------------------|--------------------|-------------------|----------------|-------------------------|-------------|-------------------------|------------------------|-----------------------|
| Parks et al. (2012)     | Gymnosperms        | -                 | Pinaceae       | <i>Pinus</i>            | 2           | 0                       | yes                    | 2                     |
| Stull et al. (2013)     | Angiosperms        | eudicots          | -              | -                       | 22          | 0                       | yes                    | 0                     |
| Mandel et al. (2014)    | Angiosperms        | eudicots          | Asteraceae     | -                       | 1           | 1061                    | no                     | 4                     |
| Weitmier et al. (2014)  | Angiosperms        | eudicots          | Asteraceae     | <i>Asclepias</i>        | 1           | 3385                    | no*                    | 6                     |
| de Sousa et al. (2014)  | Angiosperms        | eudicots          | Leguminosae    | <i>Medicago</i>         | 1           | 319                     | no                     | 5                     |
| Grover et al. (2015)    | Angiosperms        | eudicots          | Malvaceae      | <i>Gossypium</i>        | 1           | 500                     | no                     | 1                     |
| Stephens et al. (2015a) | Angiosperms        | eudicots          | Sarraceniaceae | <i>Sarracenia</i>       | 2           | 646                     | no*                    | 2                     |
| Stephens et al. (2015b) | Angiosperms        | eudicots          | Asteraceae     | <i>Helianthus</i>       | 4           | 598                     | no*                    | 2                     |
| Schmickl et al. (2016)  | Angiosperms        | eudicots          | Oxalidaceae    | <i>Oxalis</i>           | 1           | 1164                    | no*                    | 3                     |
| Heyduk et al. (2016)    | Angiosperms        | monocots          | Arecaceae      | <i>Sabal</i>            | 15          | 837                     | yes                    | 15                    |
| Syring et al. (2016)    | Gymnosperms        | -                 | Pinaceae       | <i>Pinus albicaulis</i> | 1           | 7849                    | no                     | 1                     |
| Sass et al. (2016)      | Angiosperms        | monocots          | Zingiberaceae  | -                       | 8           | 494                     | yes                    | 8                     |
| <b>This Study</b>       | <b>Angiosperms</b> | <b>All groups</b> | -              | -                       | <b>25</b>   | <b>517</b>              | <b>no*</b>             | <b>43</b>             |

1179 **Table 2.** Genomic sources for taxa used in the Angiosperm v.1 probe design. All taxa included in  
 1180 the design (n=25) are denoted with an asterisk (\*); the other taxa were utilized for locus copy  
 1181 number assessments only (n=18). Data for taxa indicated in bold were obtained from low-  
 1182 coverage genome sequencing of five vouchered specimens (Index Herbariorum code in  
 1183 parentheses). All other data were whole genome data downloaded from the sources provided  
 1184 [accessed June 20, 2013]. Sources of genomic data are indicated by superscripts as follows:  
 1185 1=www.amborella.org; 2=www.phytozome.net; 3=*Chris Buddenhagen 13041601* (FSU); 4=  
 1186 *Loran C. Anderson 24918* (FSU); 5=*Loran C. Anderson 23871* (FSU);  
 1187 6=<http://bioinformatics.psb.ugent.be/plaza/>; 7=*Rob Naczi 12038* (NY); 8= *Loran C. Anderson*  
 1188 *26956* (FSU); 9= *Loran C. Anderson 26960* (FSU); 10=*Loran C. Anderson 24932* (FSU);  
 1189 11=*Loran C. Anderson 23871* (FSU).

| Major Group  | Family         | Species                                       |
|--------------|----------------|-----------------------------------------------|
| Amborellales | Amborellaceae  | <i>Amborella trichopoda</i> <sup>1*</sup>     |
| eudicot      | Ranunculaceae  | <i>Aquilegia coerulea</i> <sup>2*</sup>       |
| eudicot      | Brassicaceae   | <i>Arabidopsis thaliana</i> <sup>2*</sup>     |
| eudicot      | Chenopodiaceae | <i>Beta vulgaris</i> <sup>2*</sup>            |
| monocot      | Bromeliaceae   | <b><i>Billbergia nutans</i></b> <sup>3*</sup> |
| monocot      | Poaceae        | <i>Brachypodium distachyon</i> <sup>2</sup>   |
| eudicot      | Brassicaceae   | <i>Brassica rapa</i> <sup>2</sup>             |
| eudicot      | Brassicaceae   | <i>Capsella rubella</i> <sup>2</sup>          |
| monocot      | Cyperaceae     | <i>Carex lurida</i> <sup>4*</sup>             |
| monocot      | Cyperaceae     | <b><i>Carex tenax</i></b> <sup>5</sup>        |
| eudicot      | Caricaceae     | <i>Carica papaya</i> <sup>6*</sup>            |
| eudicot      | Rutaceae       | <i>Citrus sinensis</i> <sup>6*</sup>          |
| eudicot      | Cucurbitaceae  | <i>Cucumis sativus</i> <sup>2*</sup>          |
| eudicot      | Myrtaceae      | <i>Eucalyptus grandis</i> <sup>6*</sup>       |
| eudicot      | Rosaceae       | <i>Fragaria vesca</i> <sup>2</sup>            |
| eudicot      | Fabaceae       | <i>Glycine max</i> <sup>2</sup>               |
| eudicot      | Malvaceae      | <i>Gossypium raimondii</i> <sup>2</sup>       |
| eudicot      | Asteraceae     | <i>Lactuca sativa</i> <sup>2*</sup>           |
| eudicot      | Linaceae       | <i>Linum usitatissimum</i> <sup>2</sup>       |

|         |               |                                                         |      |
|---------|---------------|---------------------------------------------------------|------|
| eudicot | Rosaceae      | <i>Malus domestica</i> <sup>2</sup>                     | 1190 |
| eudicot | Euphorbiaceae | <i>Manihot esculenta</i> <sup>2</sup>                   |      |
| eudicot | Fabaceae      | <i>Medicago truncatula</i> <sup>2*</sup>                |      |
| eudicot | Phrymaceae    | <i>Mimulus guttatus</i> <sup>2*</sup>                   |      |
| monocot | Musaceae      | <i>Musa acuminata</i> <sup>*</sup>                      |      |
| eudicot | Nelumbonaceae | <i>Nelumbo nucifera</i> <sup>2*</sup>                   |      |
| monocot | Poaceae       | <i>Oryza sativa</i> <sup>2*</sup>                       |      |
| eudicot | Fabaceae      | <i>Phaseolus vulgaris</i> <sup>2</sup>                  |      |
| monocot | Arecaceae     | <i>Phoenix dactylifera</i> <sup>2*</sup>                |      |
| eudicot | Salicaceae    | <i>Populus trichocarpa</i> <sup>2*</sup>                |      |
| eudicot | Rosaceae      | <i>Prunus persica</i> <sup>2*</sup>                     |      |
| monocot | Cyperaceae    | <b><i>Rhynchospora chalarocephala</i></b> <sup>7*</sup> |      |
| eudicot | Euphorbiaceae | <i>Ricinus communis</i> <sup>2*</sup>                   |      |
| monocot | Cyperaceae    | <i>Scirpus divaricatus</i> <sup>8</sup>                 |      |
| monocot | Cyperaceae    | <i>Scleria oligantha</i> <sup>9</sup>                   |      |
| monocot | Poaceae       | <i>Setaria italica</i> <sup>2</sup>                     |      |
| eudicot | Solanaceae    | <i>Solanum pimpinellifolium</i> <sup>2</sup>            |      |
| eudicot | Solanaceae    | <i>Solanum tuberosum</i> <sup>2*</sup>                  |      |
| monocot | Poaceae       | <i>Sorghum bicolor</i> <sup>2</sup>                     |      |
| monocot | Typhaceae     | <b><i>Sparganium americanum</i></b> <sup>10</sup>       |      |
| eudicot | Brassicaceae  | <i>Thellungiella halophila</i> <sup>2</sup>             |      |
| eudicot | Malvaceae     | <i>Theobroma cacao</i> <sup>2*</sup>                    |      |
| monocot | Typhaceae     | <b><i>Typha latifolia</i></b> <sup>11*</sup>            |      |
| eudicot | Vitaceae      | <i>Vitis vinifera</i> <sup>2*</sup>                     |      |

1191 **Table 3.** Overall success for targeted loci, in terms of regions remaining in the alignment for phylogenetic estimation after orthology  
 1192 and trimming phases of the bioinformatics pipeline were completed. Targets include the 499 low-copy nuclear loci and the 18  
 1193 functional mostly high-copy genes associated with selenium tolerance. The total number of orthologs indicates the total number of loci  
 1194 in the alignment, which may be larger than the number of targets since some targets appear to be multicopy.

|                        | Angiosperms | Brassicales | Caryophyllales | Dipsacales | Magnoliales | Piperales | Poales | Proteales |
|------------------------|-------------|-------------|----------------|------------|-------------|-----------|--------|-----------|
| <b>Anchor Loci</b>     |             |             |                |            |             |           |        |           |
| # Recovered            | 470         | 512         | 464            | 465        | 470         | 330       | 500    | 450       |
| % on target            | 14.1        | 20.6        | 10.3           | 8.1        | 7.0         | 1.7       | 21.9   | 6.3       |
| Contig length          | 764         | 838         | 742            | 581        | 622         | 631       | 912    | 609       |
| # Orthologs            | 384         | 540         | 405            | 488        | 483         | 189       | 488    | 159       |
| Avg Copy               | 1.0         | 1.1         | 1.1            | 1.1        | 1.0         | 1.0       | 1.0    | 1.7       |
| Max Copy               | 1.0         | 4           | 2              | 3          | 2           | 2         | 2      | 4         |
| <b>Functional Loci</b> |             |             |                |            |             |           |        |           |
| # Recovered            | 3           | 15          | 9              | 12         | 10          | 7         | 8      | 11        |
| # Orthologs            | 0           | 34          | 17             | 26         | 20          | 10        | 13     | 55        |
| Avg # Copy             | n/a         | 2.3         | 1.9            | 2.2        | 2.0         | 1.3       | 1.6    | 5.0       |
| Max # Copy             | n/a         | 5           | 4              | 4          | 4           | 2         | 3      | 14        |

1195

1196 **Table 4.** Properties of probe regions and flanks for deep, intermediate, and shallow-scale alignments.

|                     | <b>Probe Region</b> |            |               |        | <b>Flanks</b> |            |               |        |
|---------------------|---------------------|------------|---------------|--------|---------------|------------|---------------|--------|
|                     | Total Sites         | Var. Sites | Inform. Sites | % Var. | Total Sites   | Var. Sites | Inform. Sites | % Var. |
| Angiosperms         | 138,616             | 103,616    | 94,185        | 74.8   | N/A           | N/A        | N/A           | N/A    |
| <i>Carex</i>        | 114,623             | 16,512     | 3,592         | 13.9   | 188,315       | 43,195     | 11,307        | 23.6   |
| Caryophyllales      | 96,372              | 23,355     | 9,171         | 23.6   | 66,471        | 19,490     | 6,964         | 29.2   |
| Cyperaceae          | 120,774             | 25,082     | 7,990         | 19.8   | 224,529       | 70,104     | 20,716        | 31.6   |
| Dipsacales          | 80,064              | 21,501     | 10,151        | 26.3   | 12,429        | 3,166      | 1,315         | 23.4   |
| <i>Magnolia</i>     | 110,509             | 6,460      | 1,181         | 5.6    | 87,905        | 10,450     | 1,843         | 12.4   |
| <i>Protea</i>       | 82,258              | 11,391     | 544           | 13.7   | 66,269        | 4,644      | 536           | 7.3    |
| <i>Rhynchospora</i> | 132,656             | 29,530     | 16,615        | 20.9   | 164,027       | 60,759     | 35,824        | 36.9   |
| <i>Stanleya</i>     | 129,500             | 2,036      | 149           | 1.4    | 178,670       | 11,933     | 1,975         | 6.9    |

1197
